# Supplementary material for: Click Chemistry of Selenium Dihalides: Novel Bicyclic Organoselenium Compounds Based on Selenenylation/Bis-Functionalization Reactions and Evaluation of Glutathione Peroxidase-like Activity
Source: MDPI journal article supplement (doi:10.3390/ijms232415629), 2022-12-09

## Supplementary Materials

# Click Chemistry of Selenium Dihalides: Novel Bicyclic Organoselenium Compounds Based on Selenenylation/Bis-Functionalization Reactions and Evaluation of Glutathione Peroxidase-like Activity

Maxim V. Musalov \* and Vladimir A. Potapov

A. E. Favorsky Irkutsk Institute of Chemistry, Siberian Division of The Russian Academy of Sciences,  
1 Favorsky Str., 664033 Irkutsk, Russia

\* Correspondence: musalov\_maxim@irioch.irk.ru

## Table of Contents

|                                                                                         |       |
|-----------------------------------------------------------------------------------------|-------|
| Experimental (General Information)                                                      | 2     |
| Examples of $^1\text{H}$ and $^{13}\text{C}$ -NMR Spectra                               | 3-11  |
| Examples of $^1\text{H}$ and $^{13}\text{C}$ -NMR Spectra                               | 11-22 |
| Examples of $^{77}\text{Se}$ -NMR and $^1\text{H}$ - $^{77}\text{Se}$ -HMBC NMR Spectra | 22-25 |
| Examples of Mass Spectra                                                                | 26-29 |

## Experimental (General Information)

The  $^1\text{H}$  (400.1 MHz),  $^{13}\text{C}$  (100.6 MHz), and  $^{77}\text{Se}$  (76.3 MHz) NMR spectra were recorded on a Bruker DPX-400 spectrometer (Bruker BioSpin GmbH, Rheinstetten, Germany) and referred to the residual solvent peaks of  $\text{CDCl}_3$  ( $\delta = 7.27$  and  $77.16$  ppm in  $^1\text{H}$ - and  $^{13}\text{C}$ -NMR, respectively), DMSO ( $\delta = 2.50$  and  $39.50$  ppm for  $^1\text{H}$ - and  $^{13}\text{C}$ -NMR, respectively) or  $\text{D}_2\text{O}$  ( $\delta = 4.79$  ppm for  $^1\text{H}$ -NMR) and dimethyl selenide ( $^{77}\text{Se}$ -NMR).

The mass spectra were recorded on a Shimadzu GCMS-QP5050A (Shimadzu Corporation, Kyoto, Japan) with electron impact (EI) ionization (70 eV).

## Examples of $^1\text{H}$ -NMR Spectra

### $^1\text{H}$ -NMR spectrum of compound 3 ( $\text{D}_2\text{O}$ )

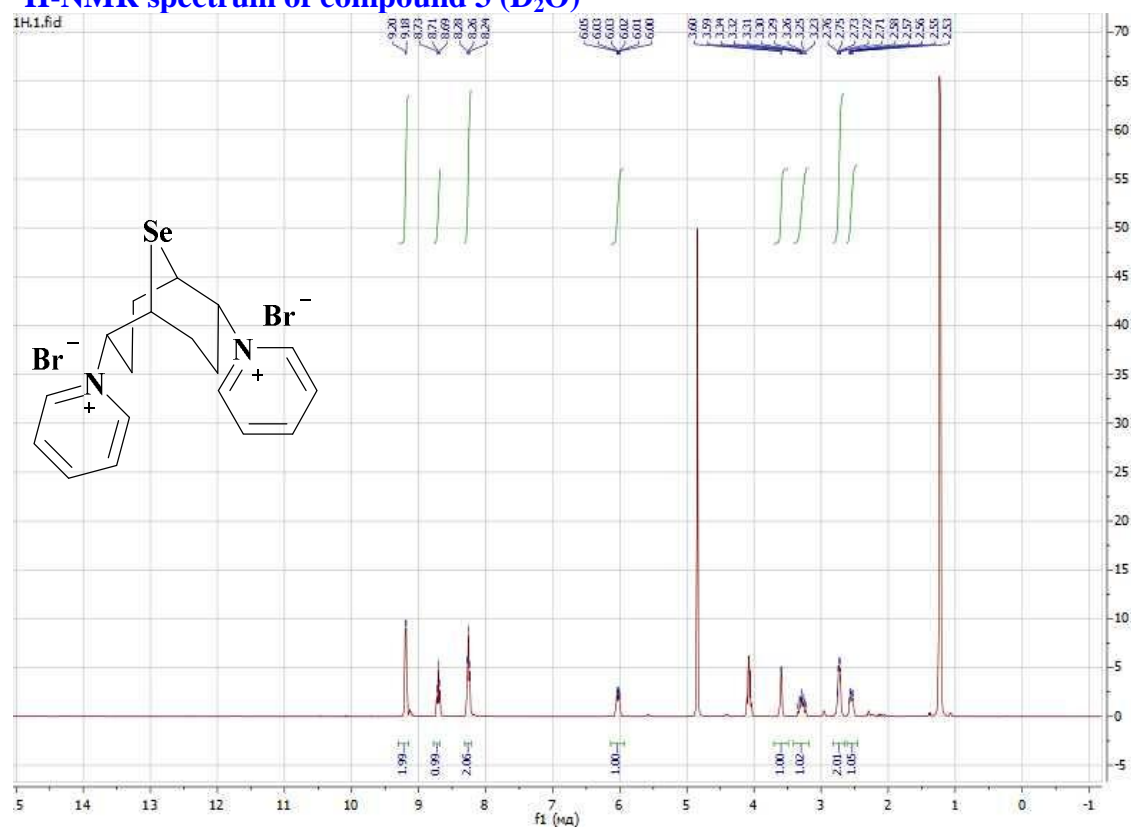

### $^1\text{H}$ -NMR spectrum of compound 4

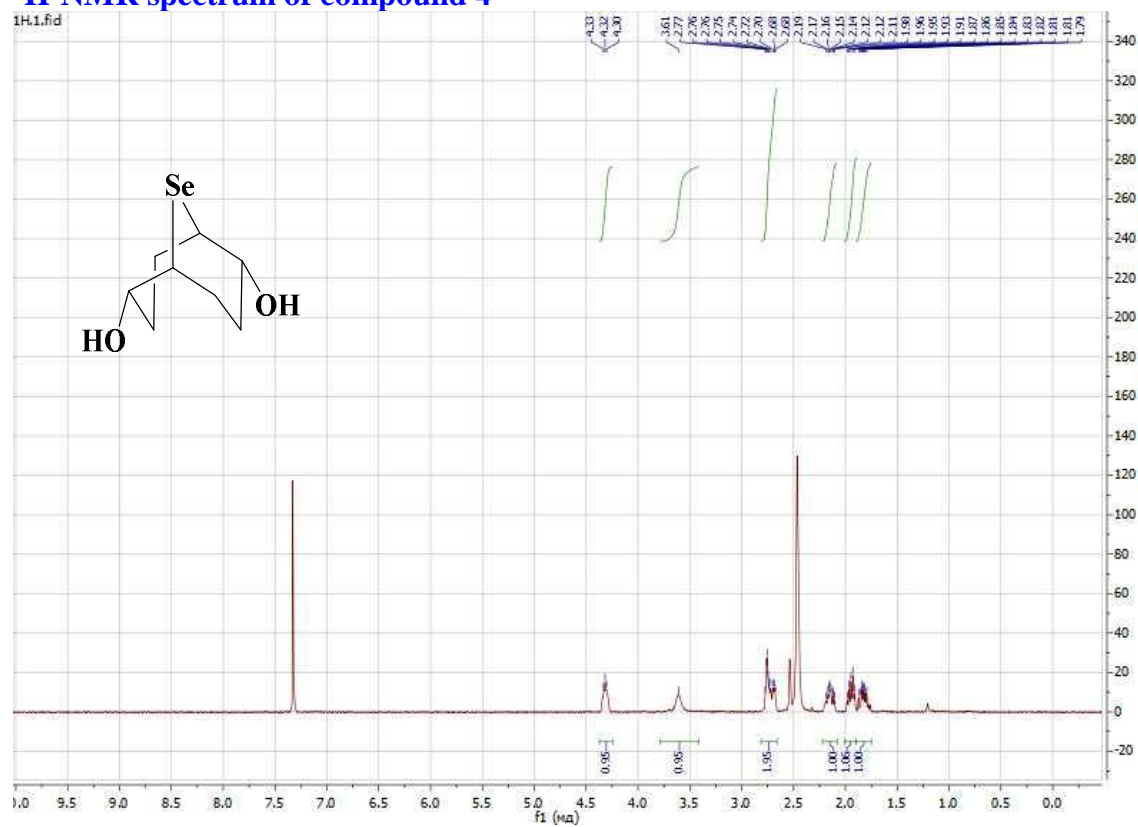

### <sup>1</sup>H-NMR spectrum of compound 5

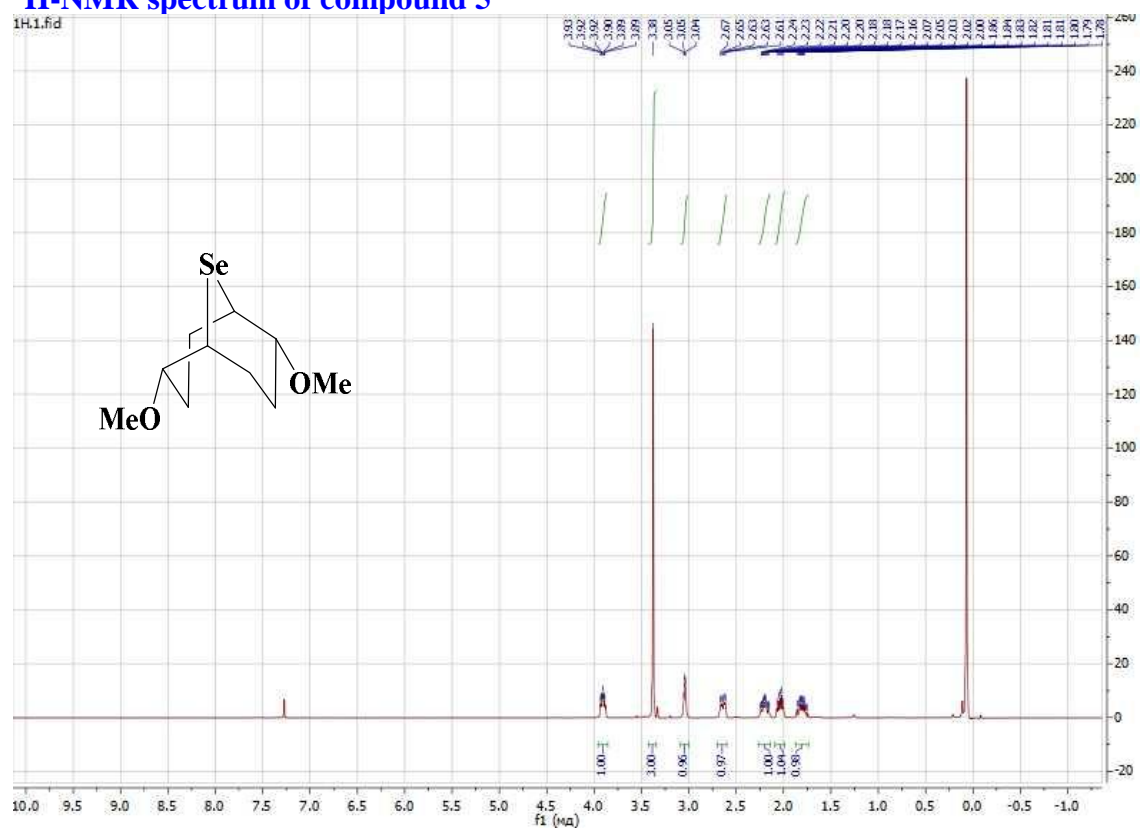

### <sup>1</sup>H-NMR spectrum of compound 6

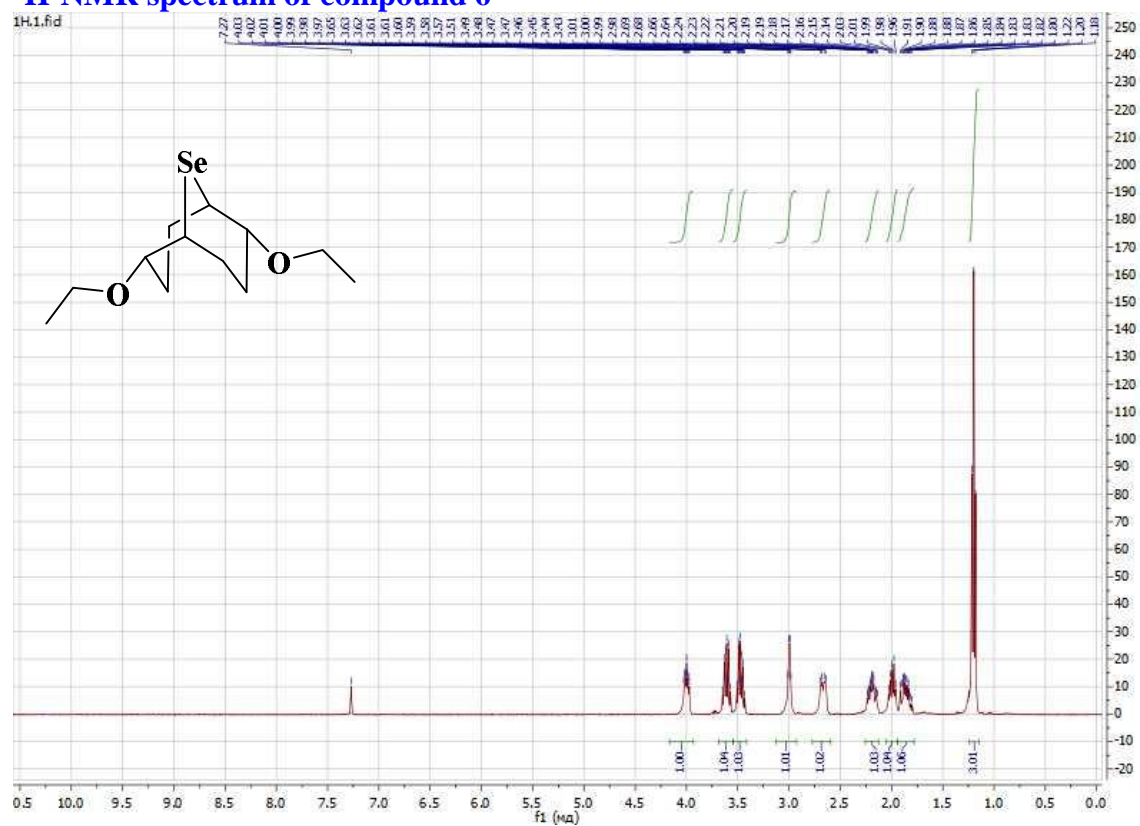



# <sup>1</sup>H-NMR spectrum of compound 9

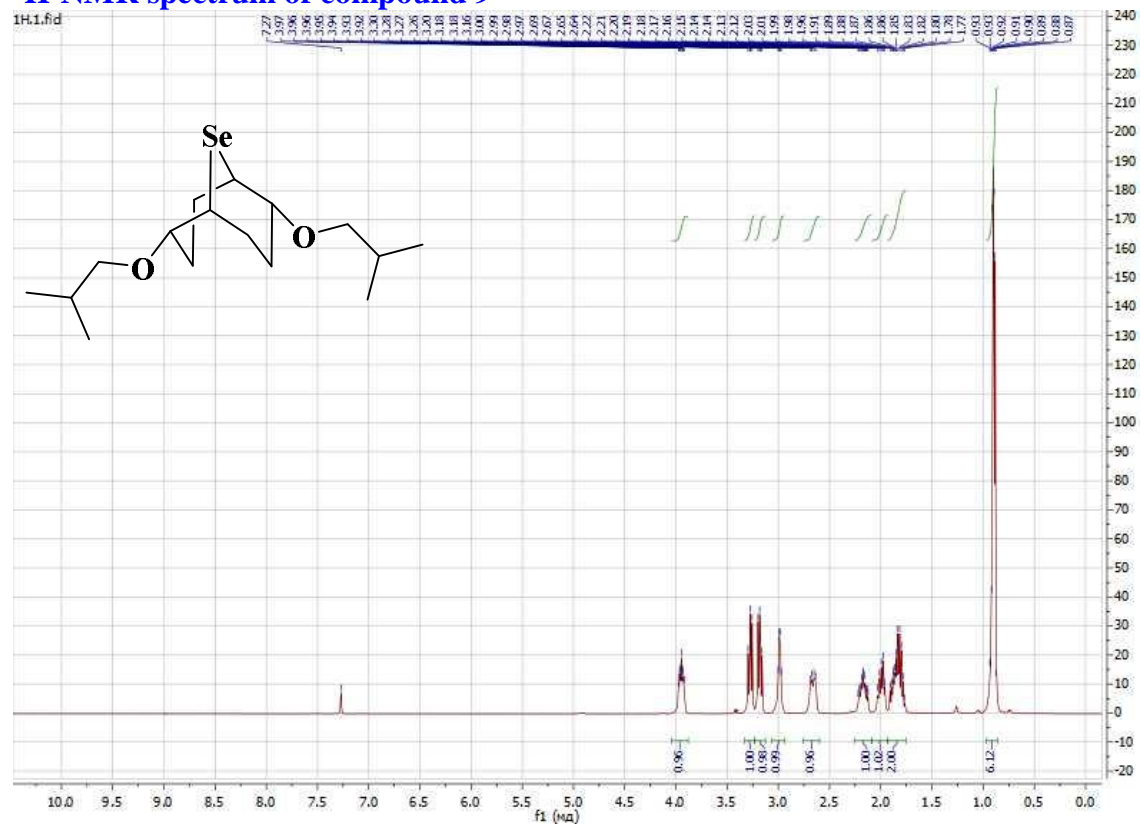

# <sup>1</sup>H-NMR spectrum of compound 10

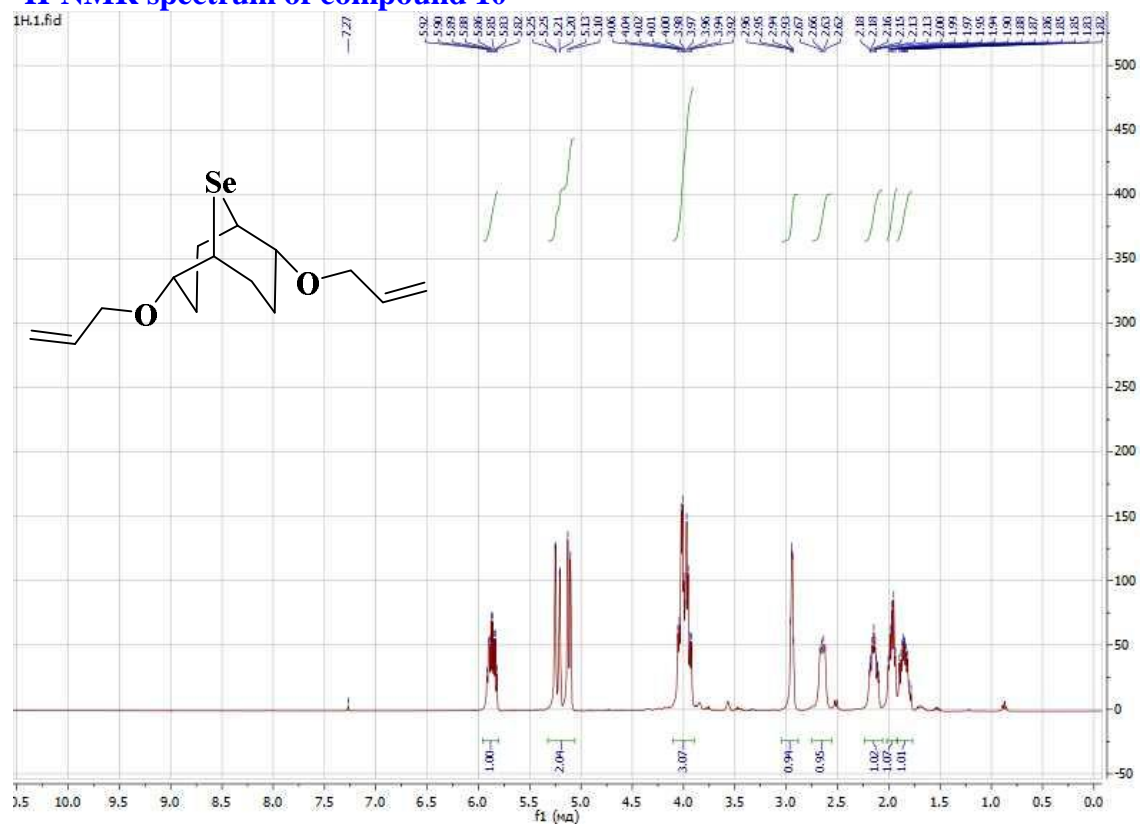

# <sup>1</sup>H-NMR spectrum of compound 11

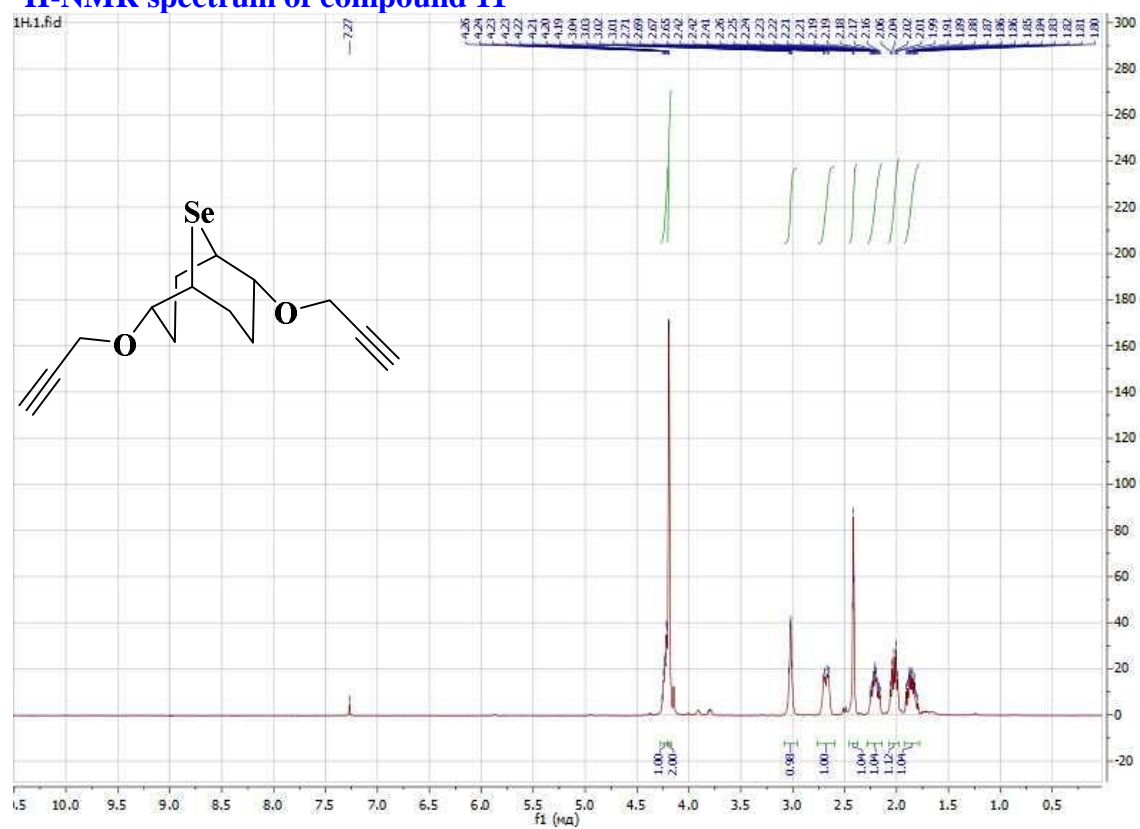

# <sup>1</sup>H-NMR spectrum of compound 12

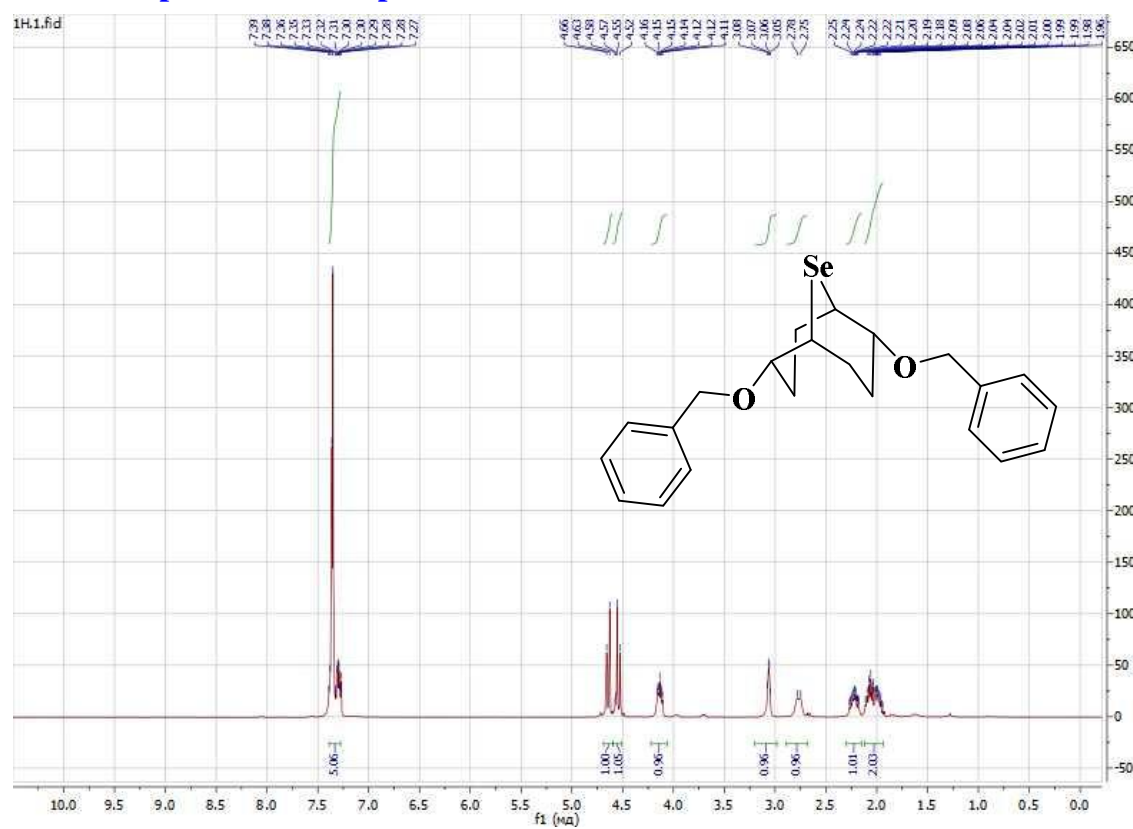



# <sup>1</sup>H-NMR spectrum of compound 13

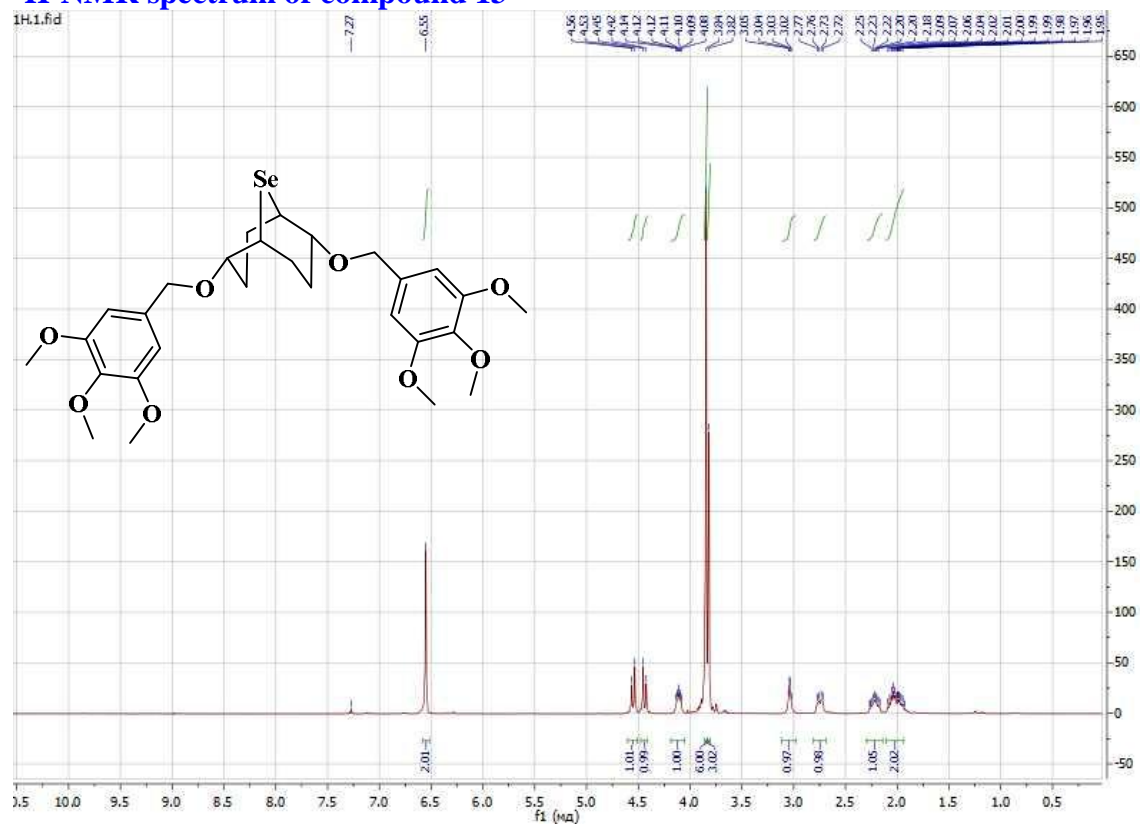

# <sup>1</sup>H-NMR spectrum of compound 14

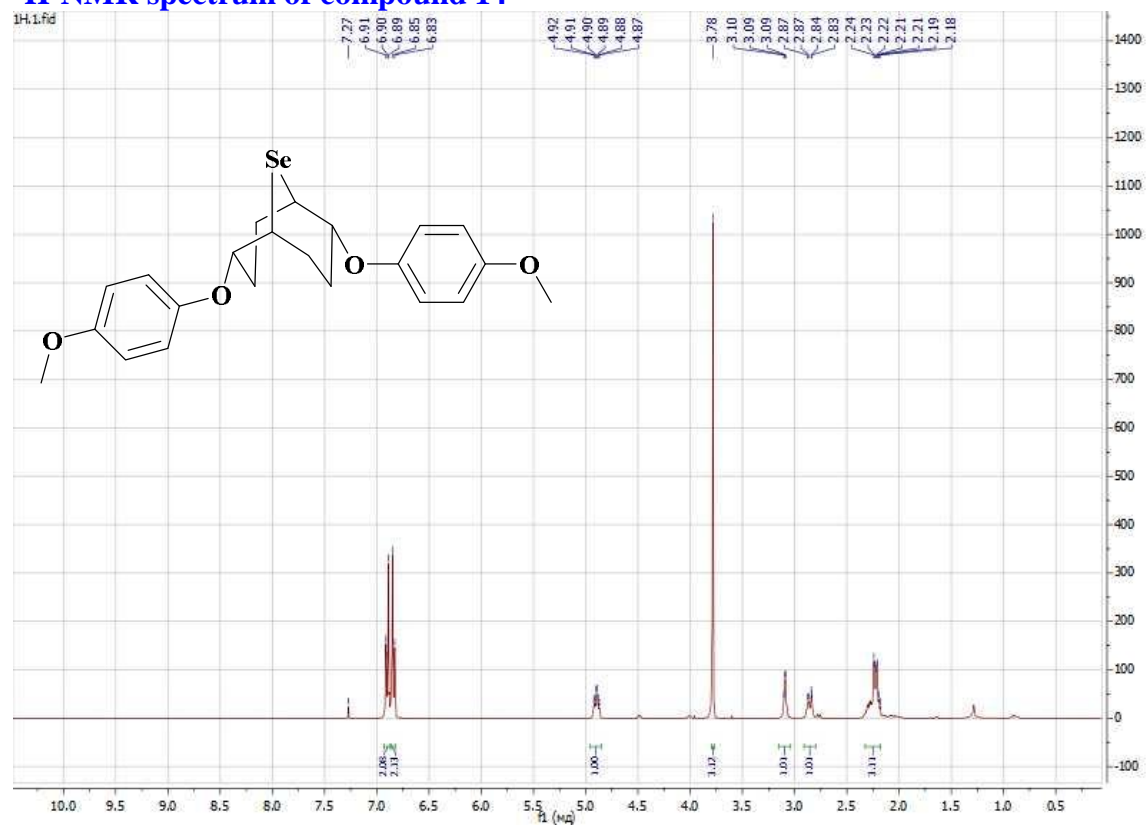



# <sup>1</sup>H-NMR spectrum of compound 15

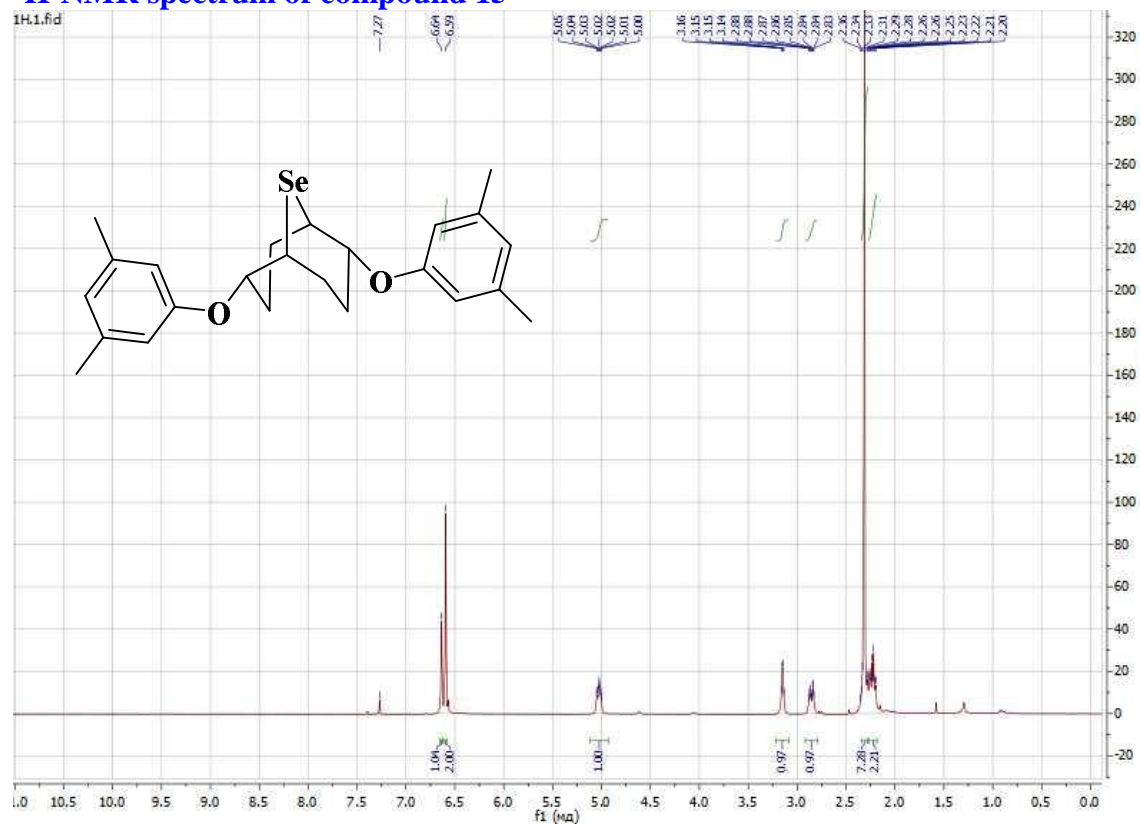

# <sup>1</sup>H-NMR spectrum of compound 16

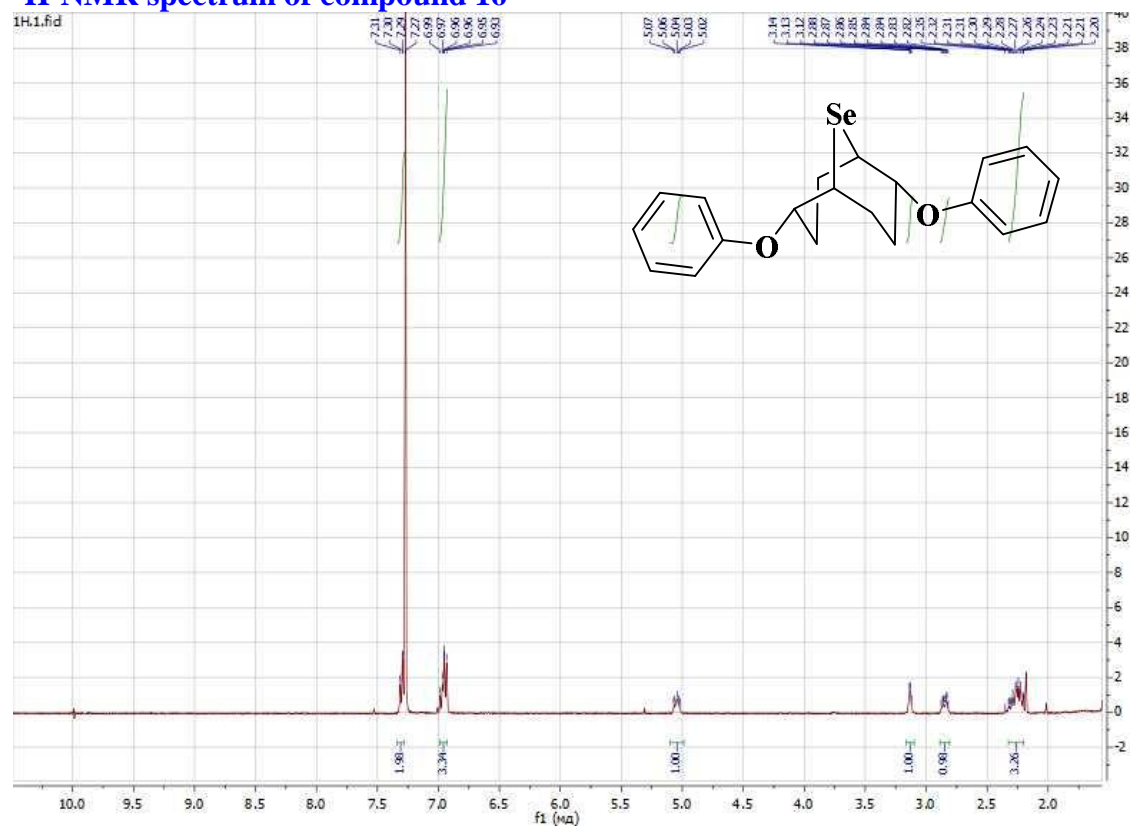

# <sup>1</sup>H-NMR spectrum of compound 18

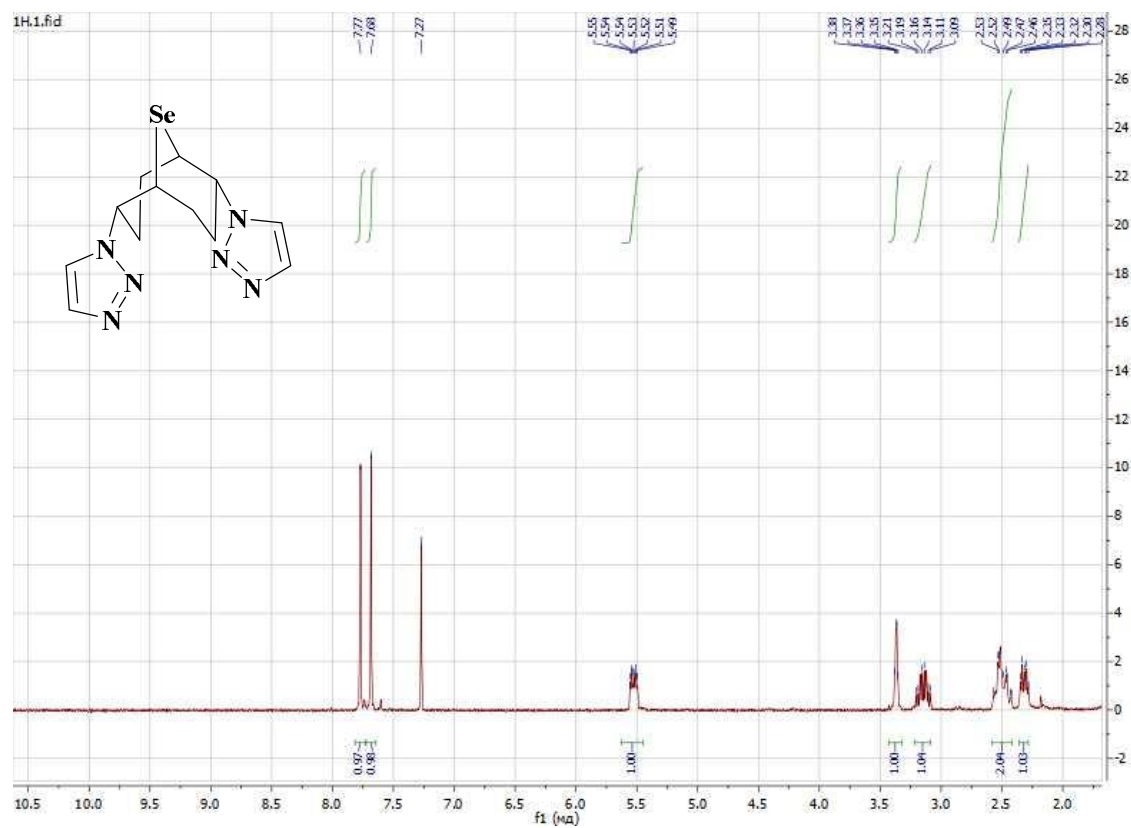

# <sup>1</sup>H-NMR spectrum of compound 22

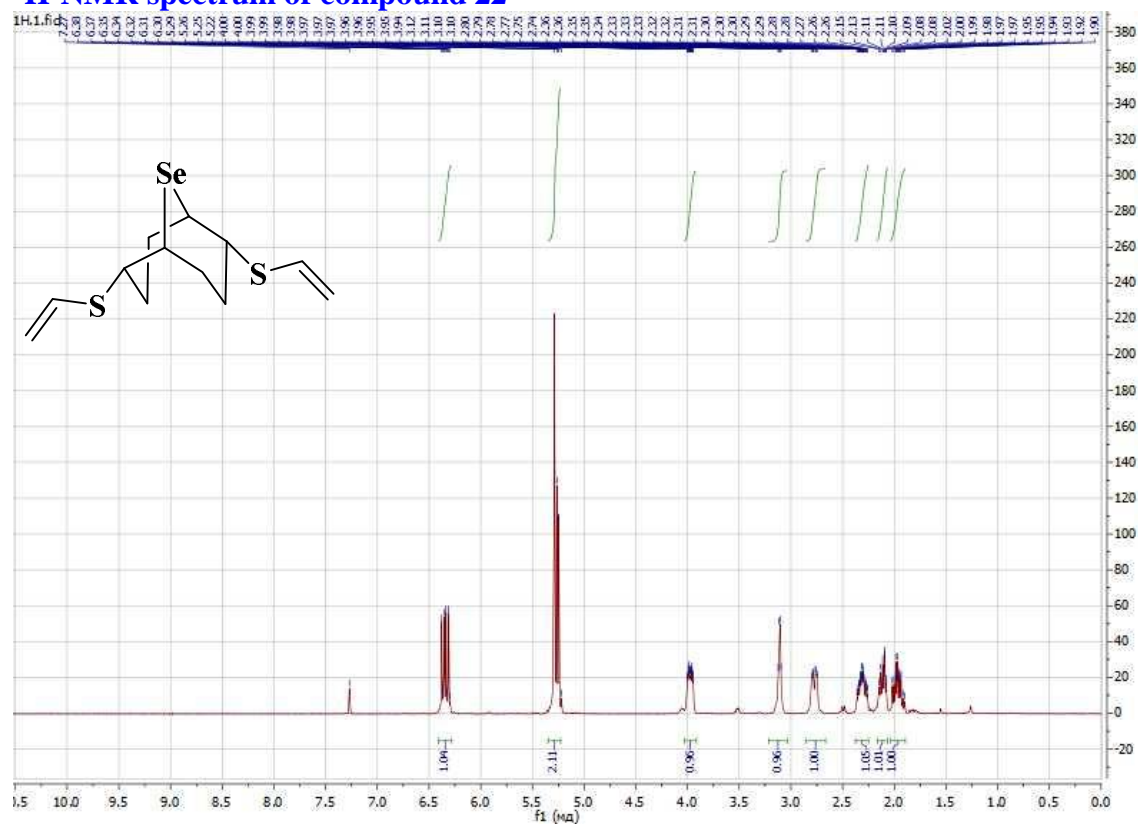

# <sup>1</sup>H-NMR spectrum of compound 23

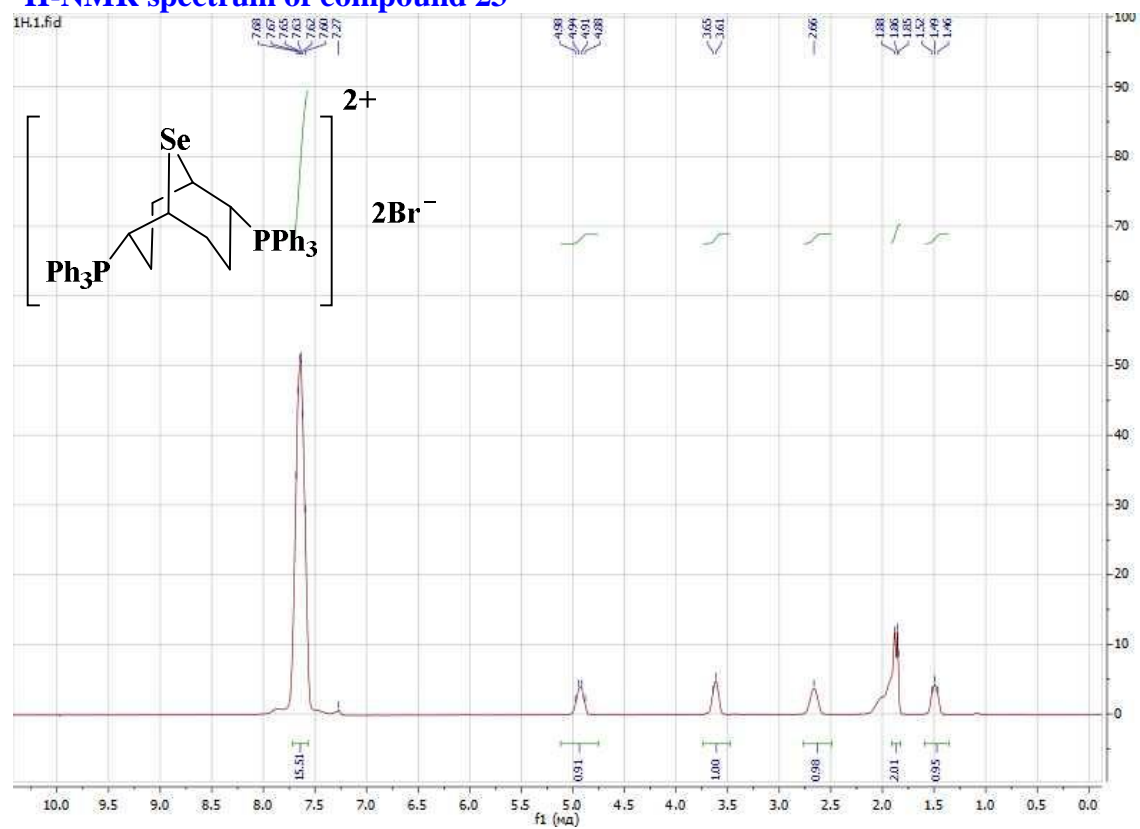

# <sup>1</sup>H-NMR spectrum of compound 24

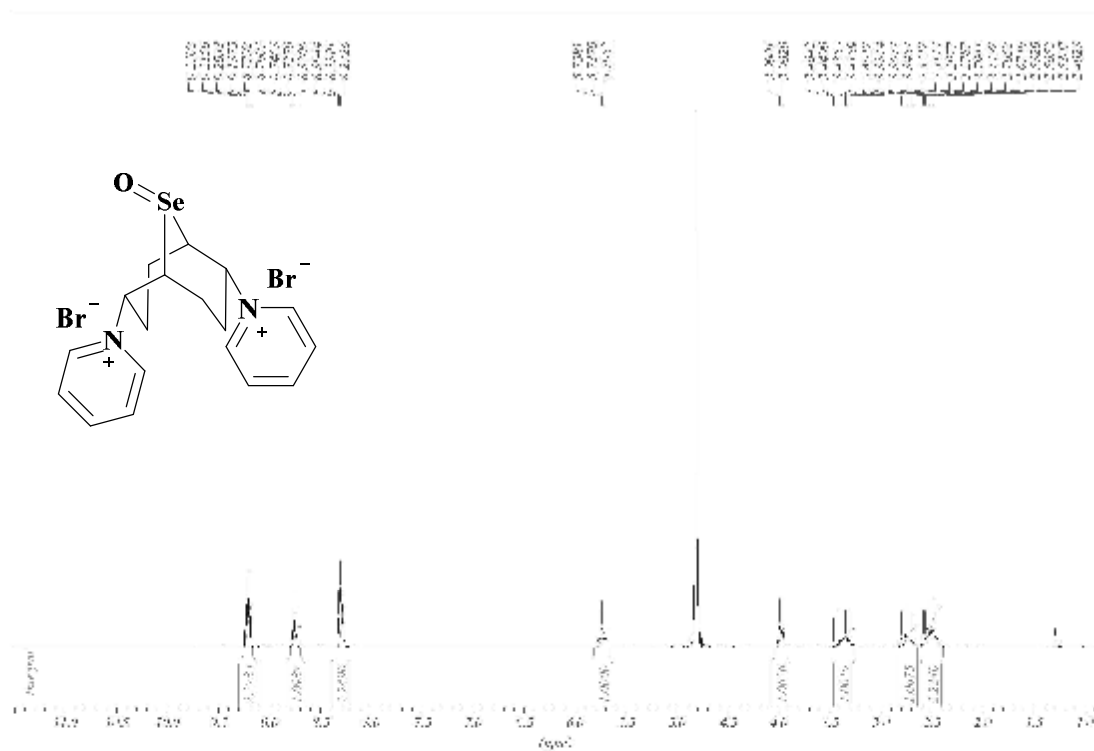

### <sup>1</sup>H-NMR spectrum of compound 25

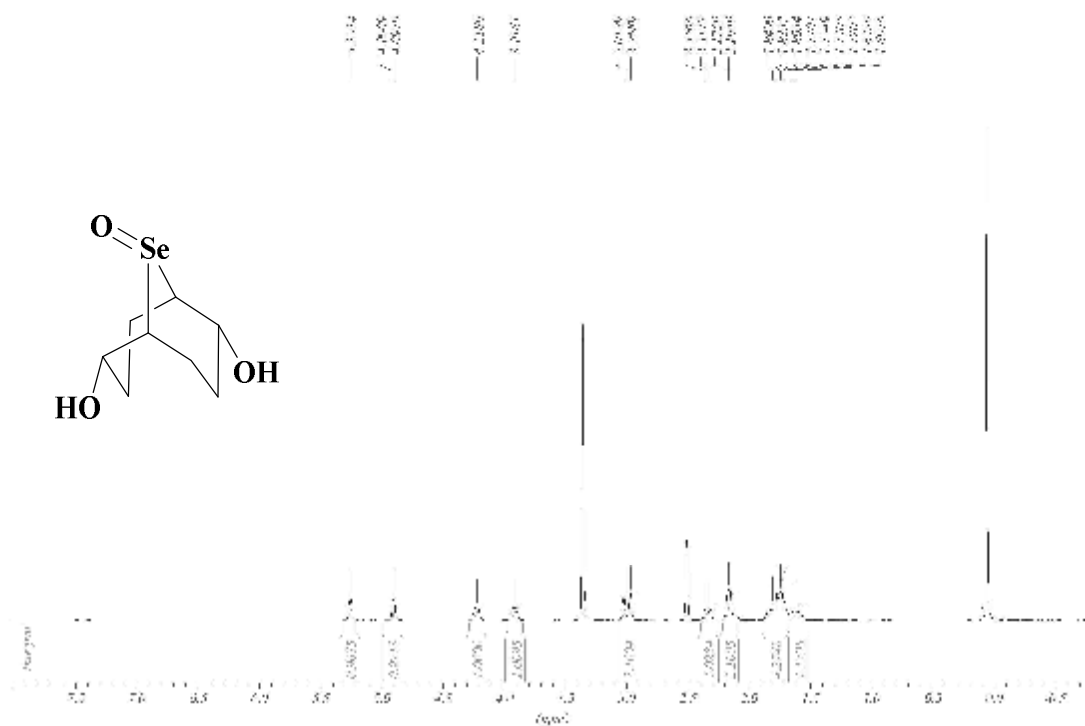

## Examples of <sup>13</sup>C-NMR Spectra

### <sup>13</sup>C-NMR spectrum of compound 3 (D<sub>2</sub>O)

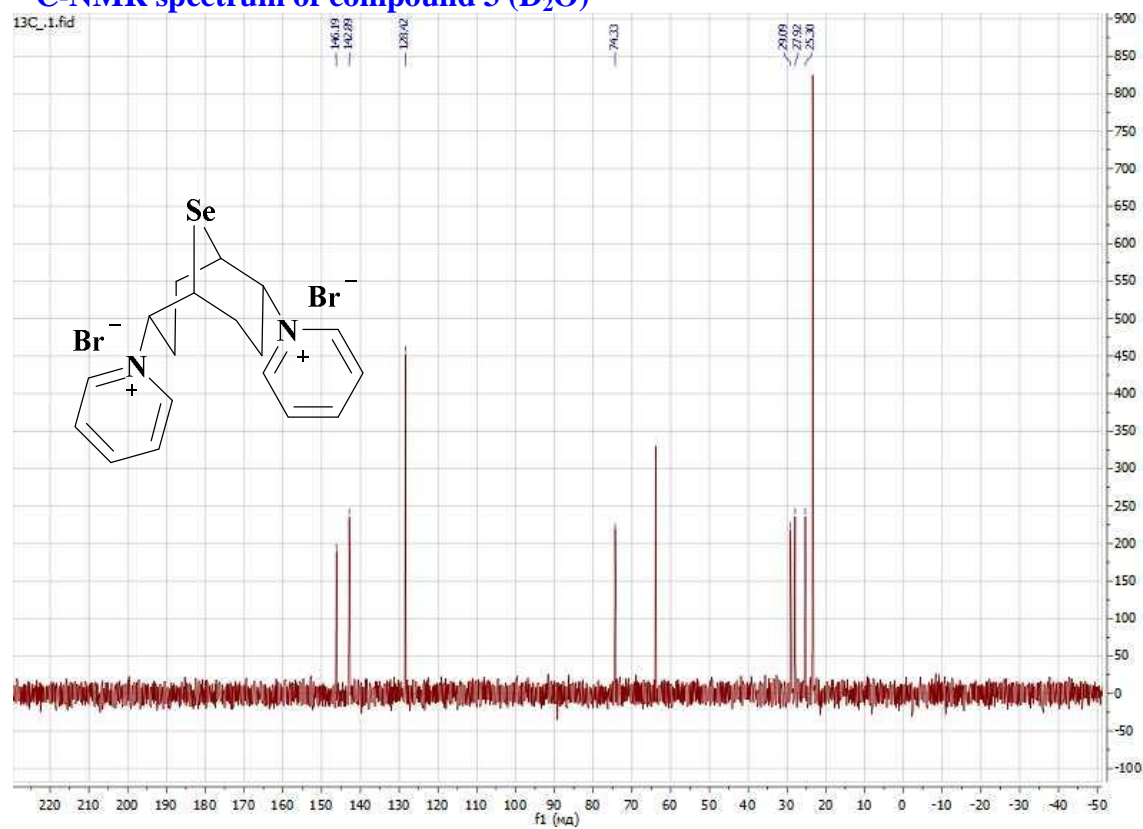

### $^{13}\text{C}$ -NMR spectrum of compound 4

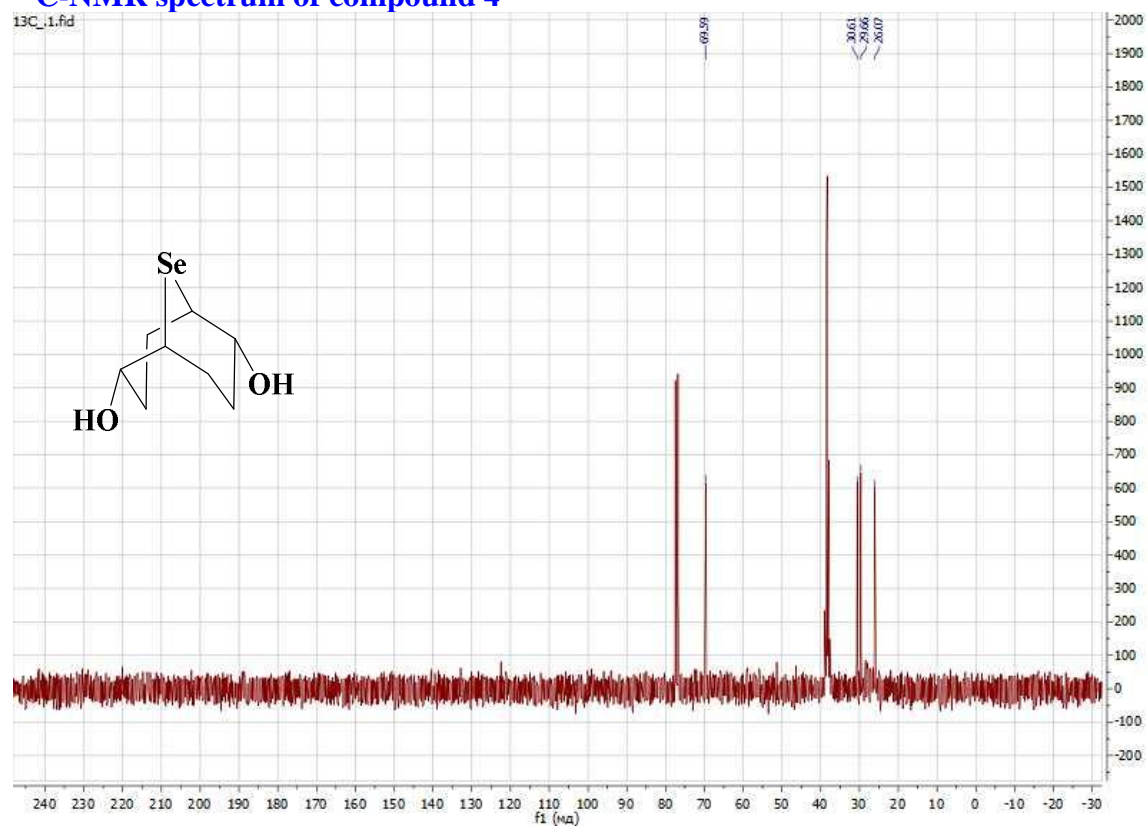

### $^{13}\text{C}$ -NMR spectrum of compound 5

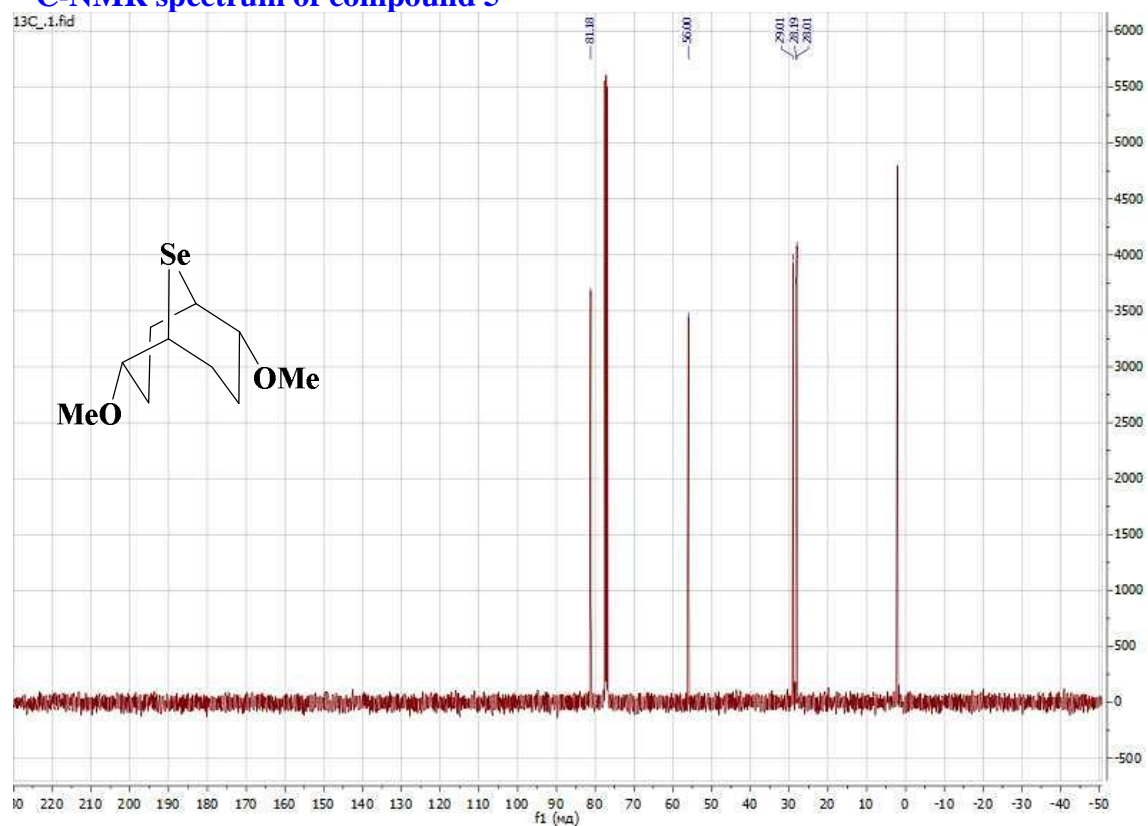

**$^{13}\text{C}$ -NMR spectrum of compound 6**

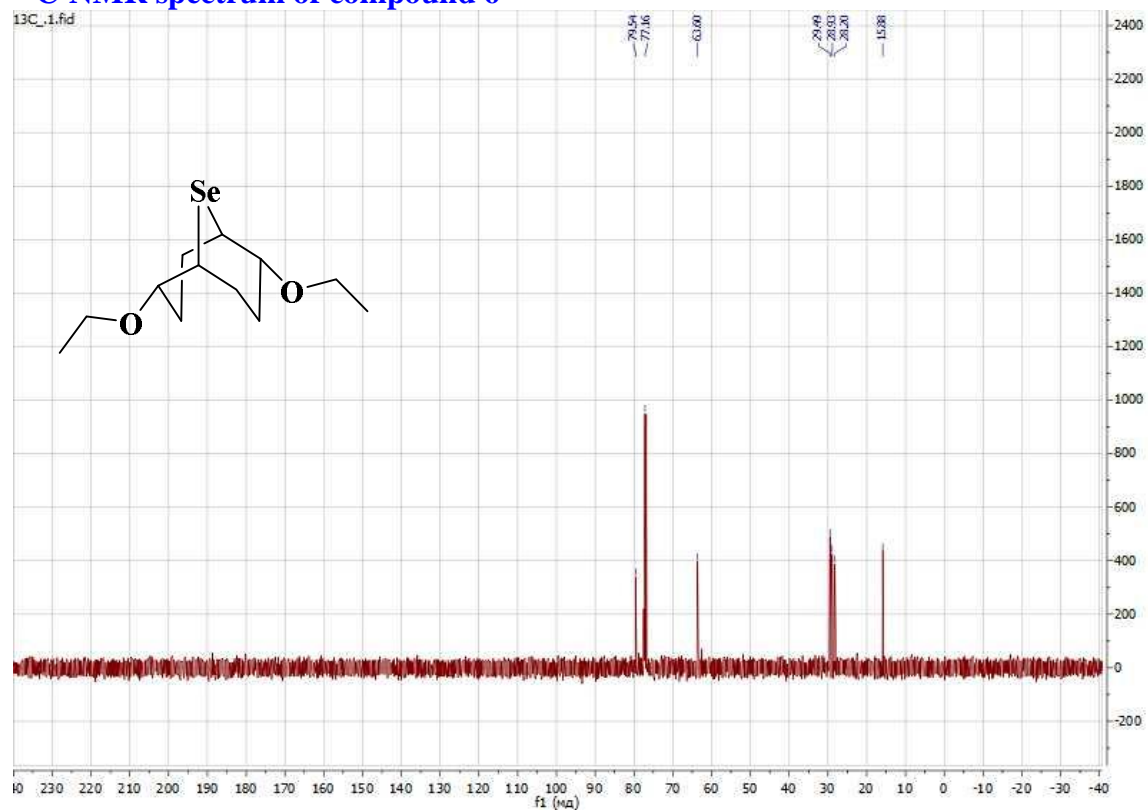

**$^{13}\text{C}$ -NMR spectrum of compound 7**

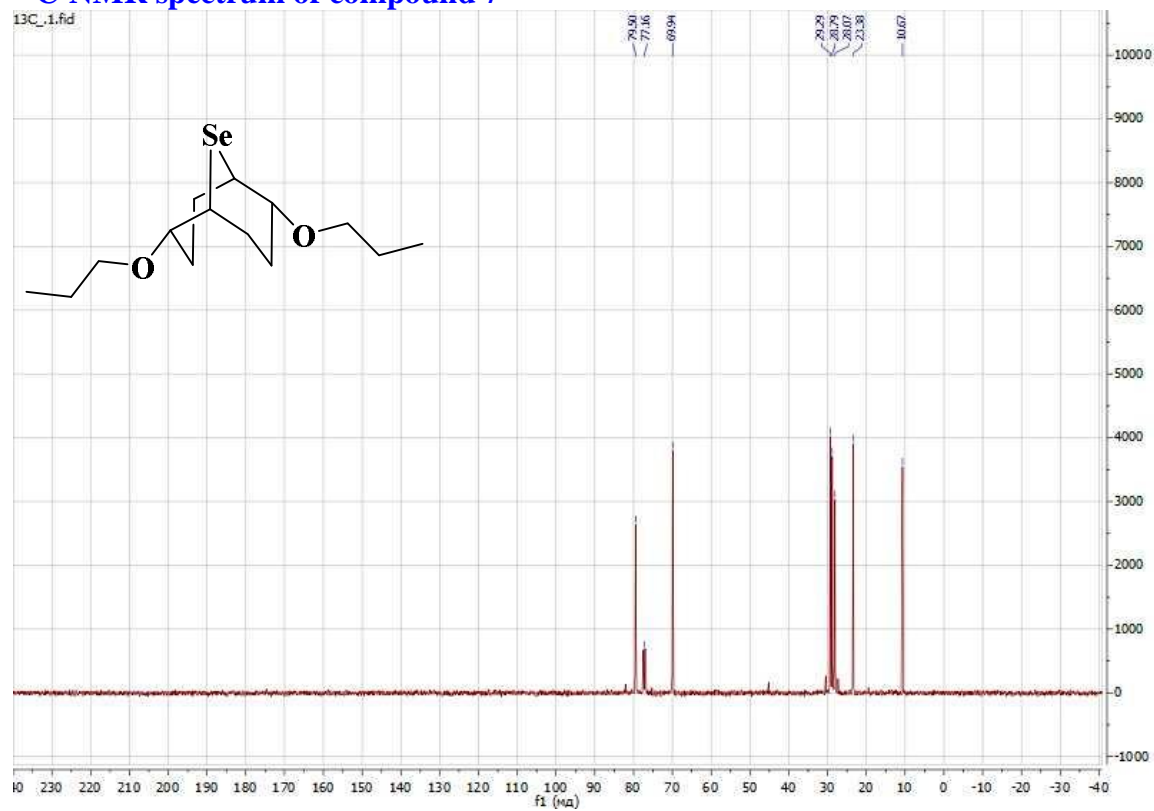

### $^{13}\text{C}$ -NMR spectrum of compound 8

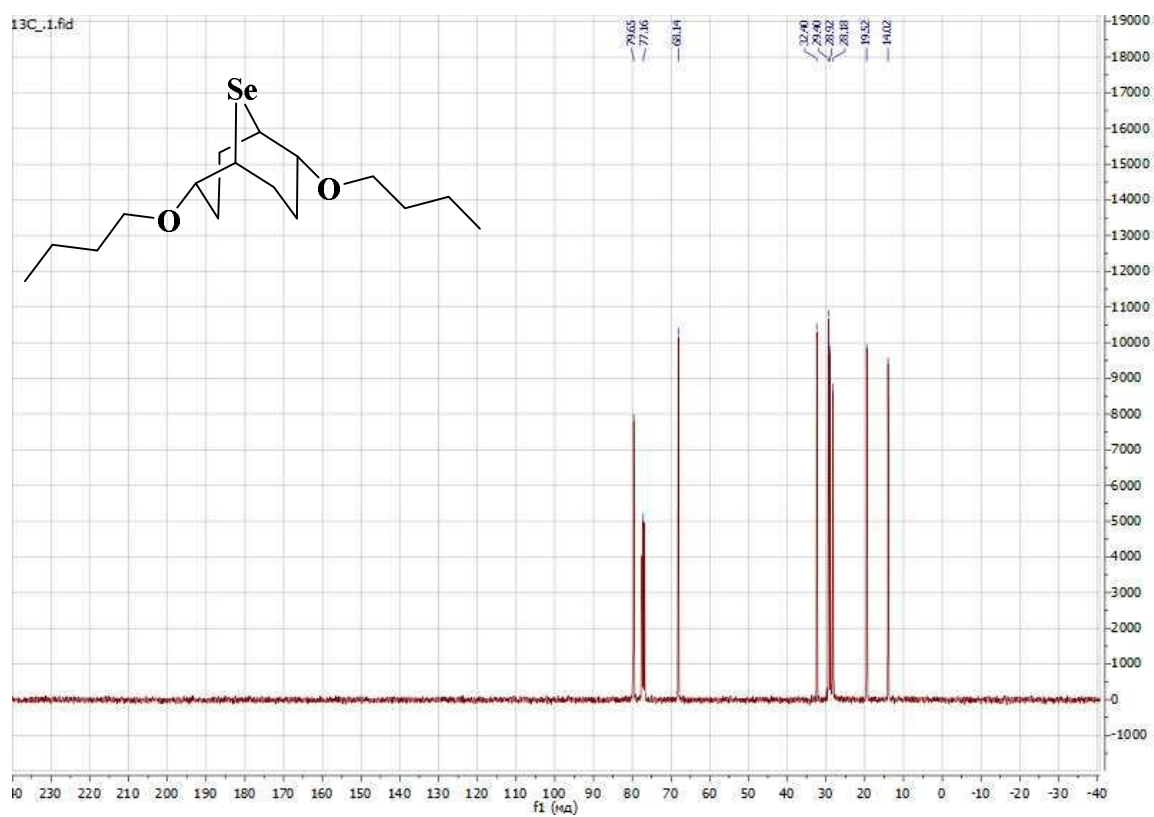

### $^{13}\text{C}$ -NMR spectrum of compound 9

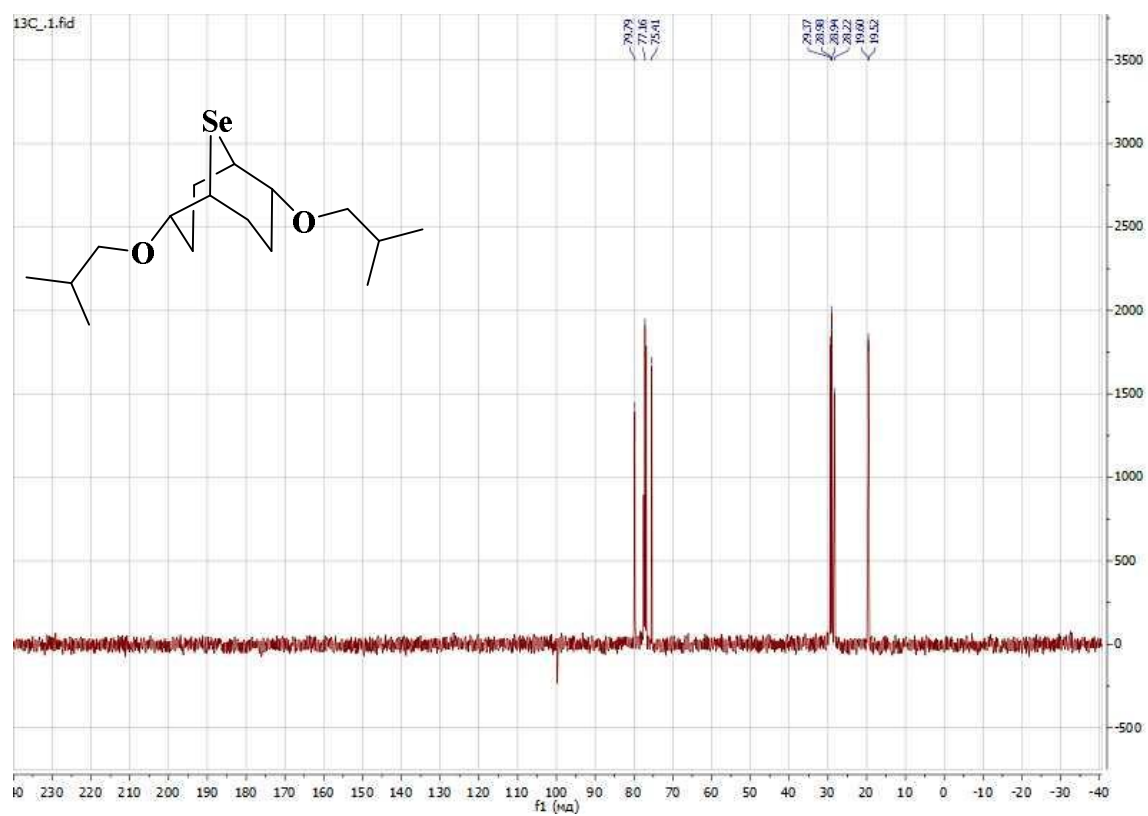



### $^{13}\text{C}$ -NMR spectrum of compound 10

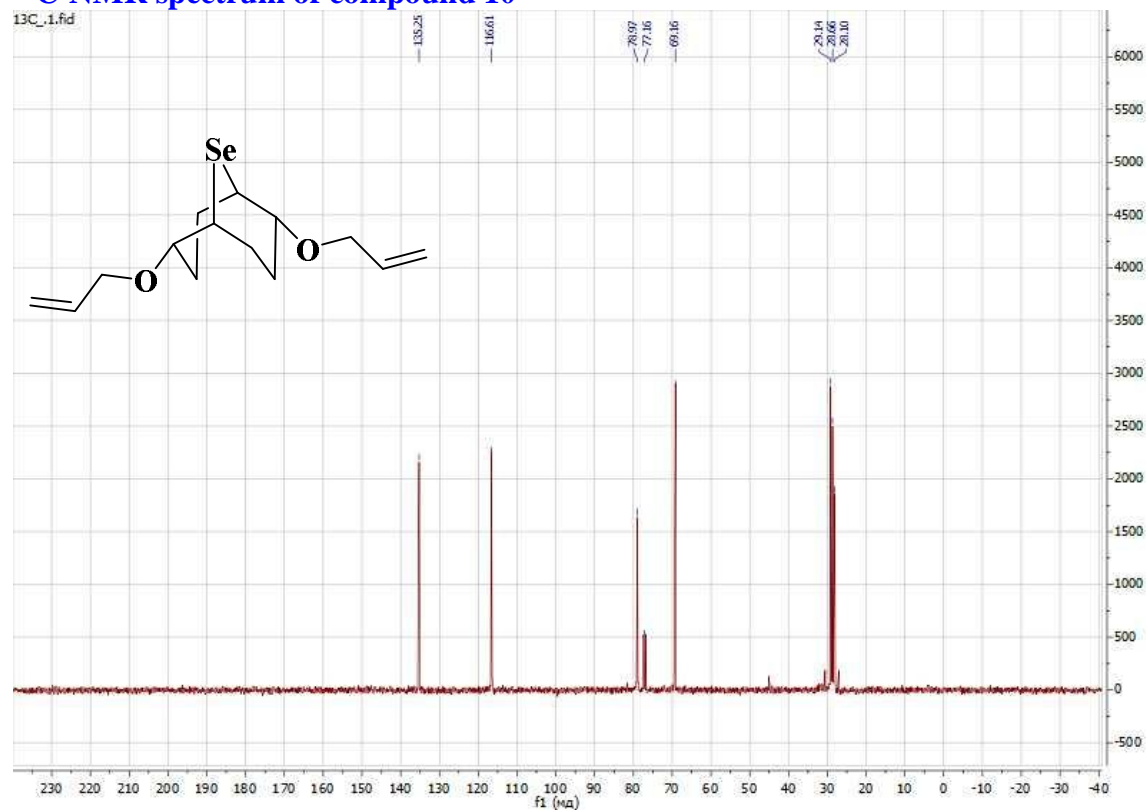

### $^{13}\text{C}$ -NMR spectrum of compound 11

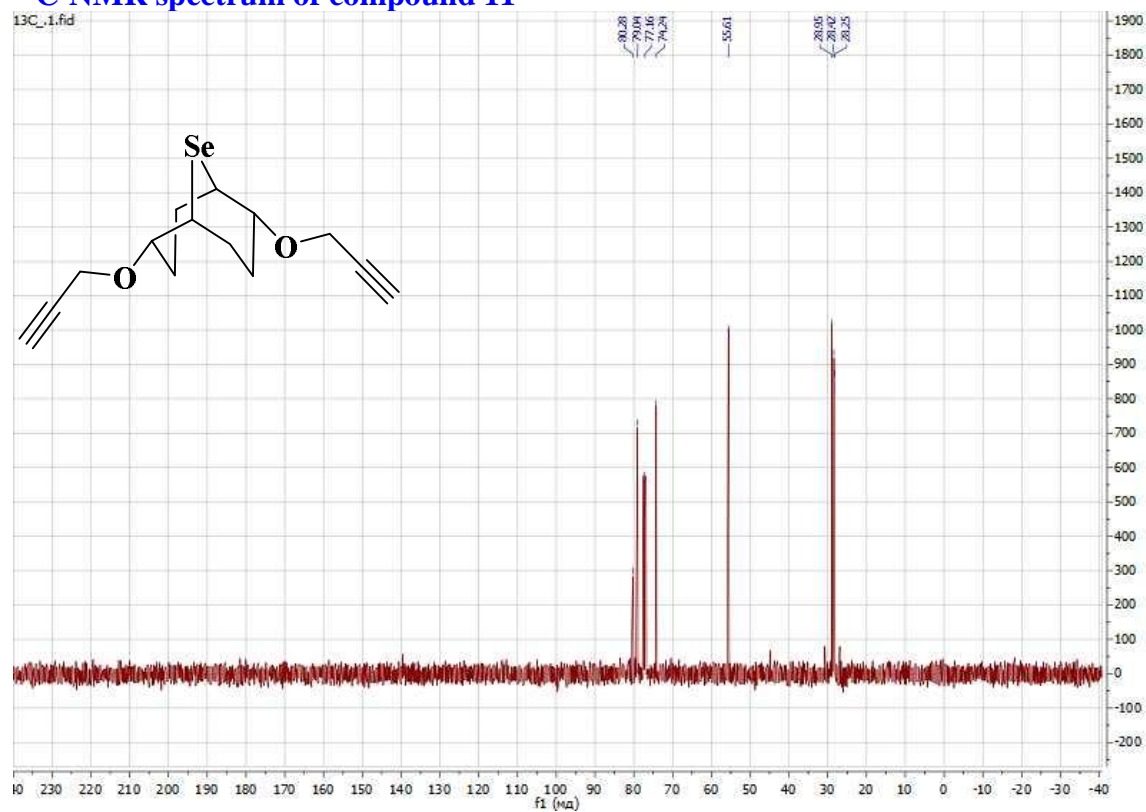

### $^{13}\text{C}$ -NMR spectrum of compound 12

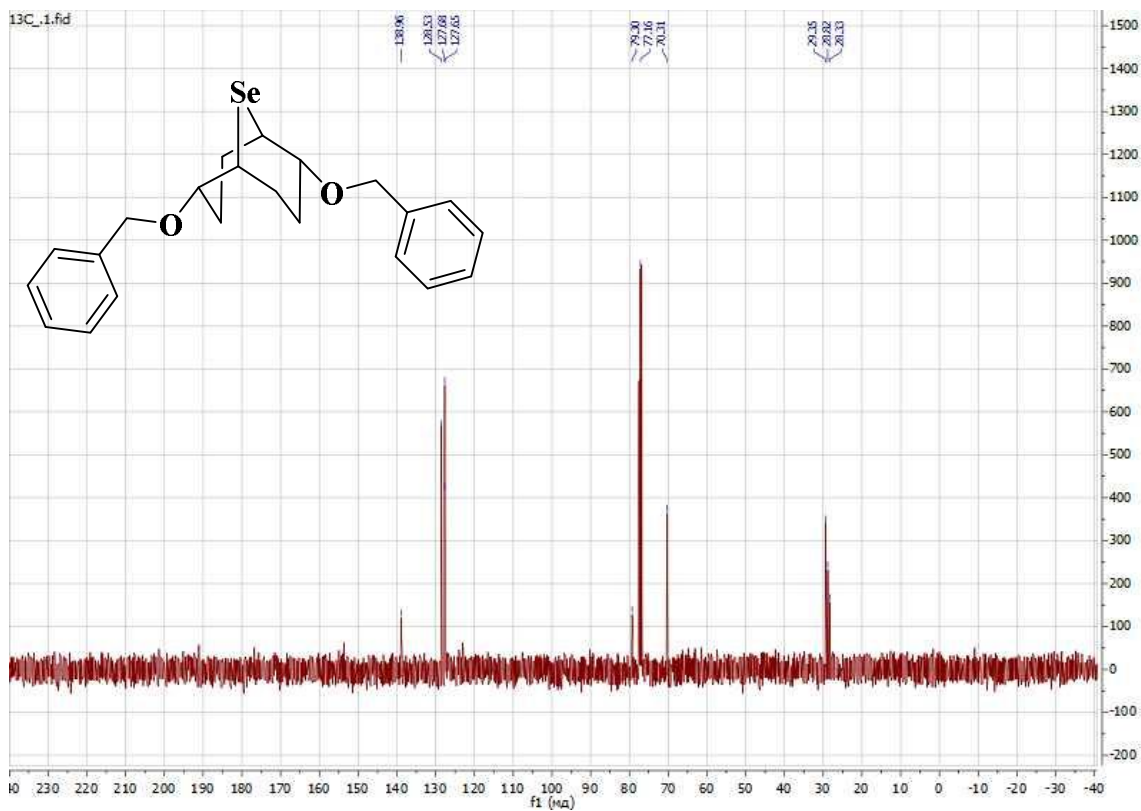

### $^{13}\text{C}$ -NMR spectrum of compound 13

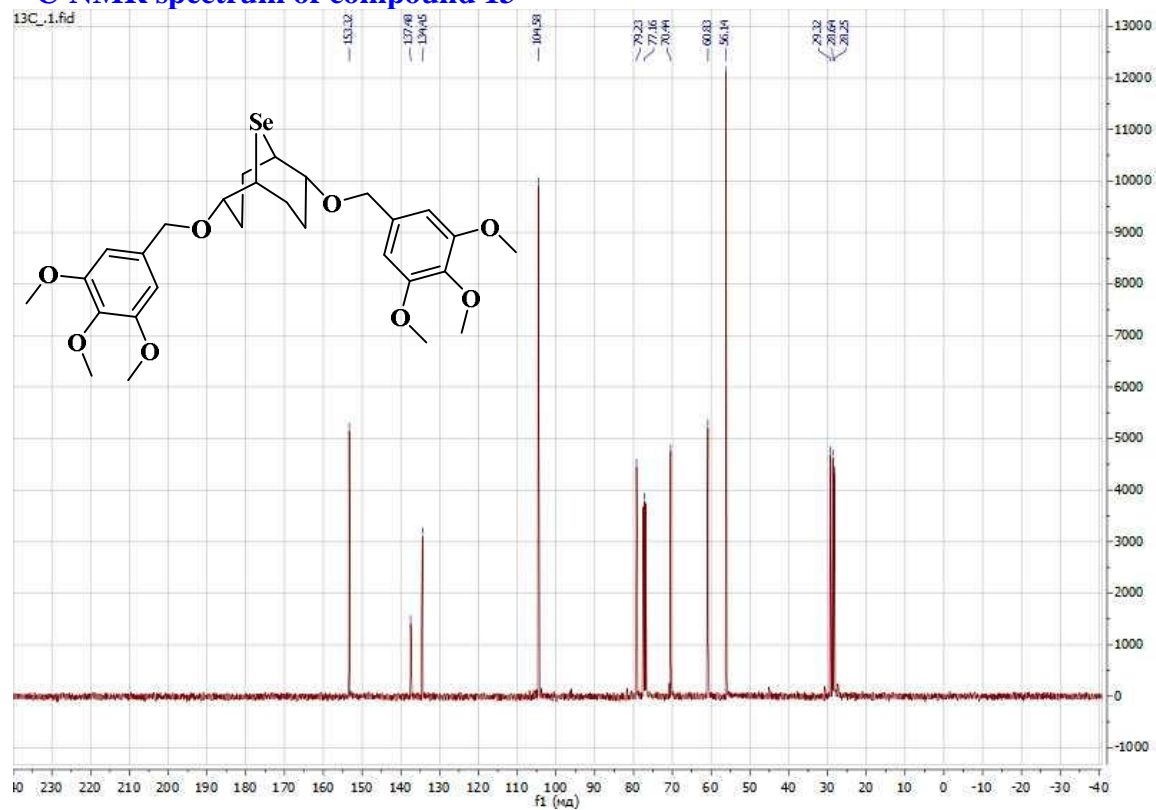

### <sup>13</sup>C-NMR spectrum of compound 14

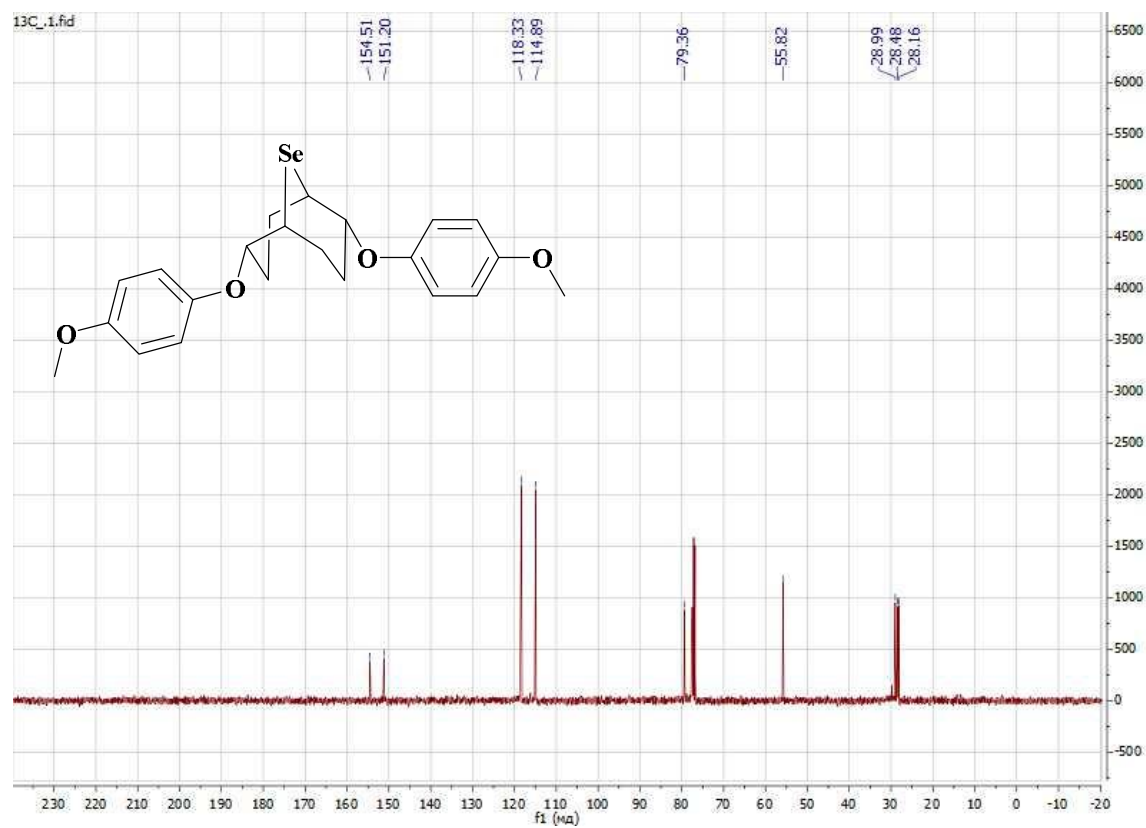

### <sup>13</sup>C-NMR spectrum of compound 15

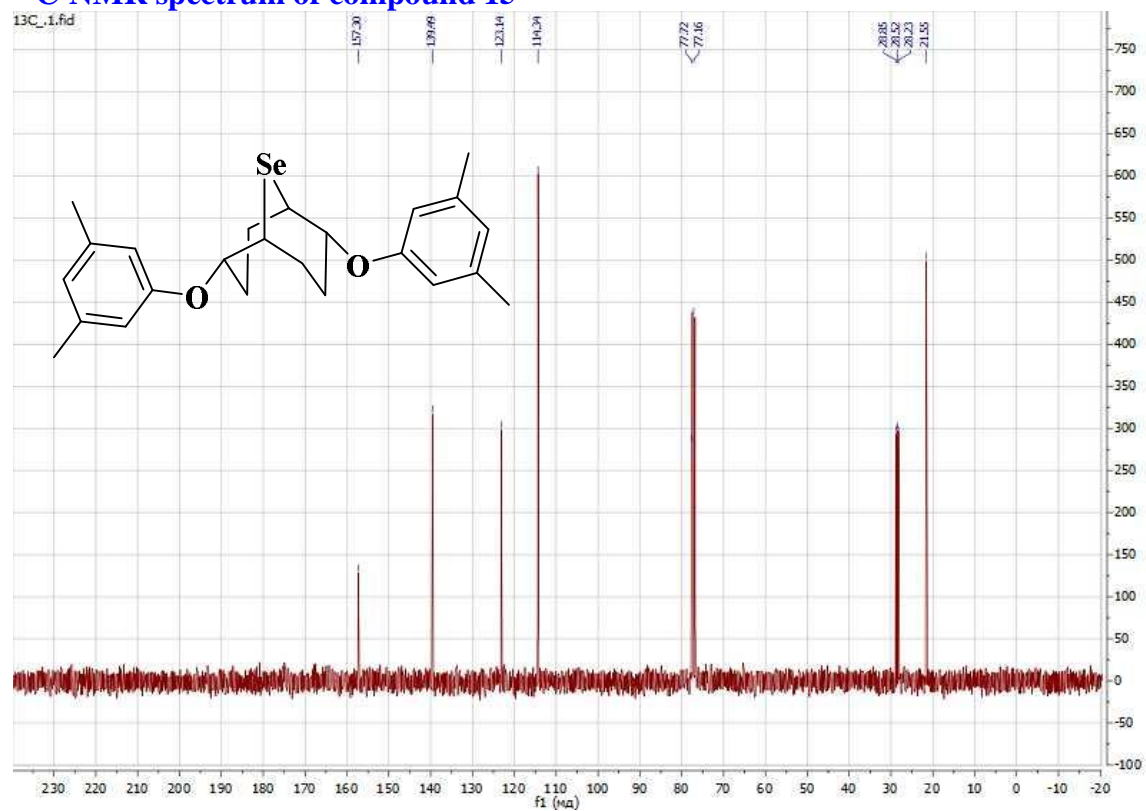

**$^{13}\text{C}$ -NMR spectrum of compound 16**

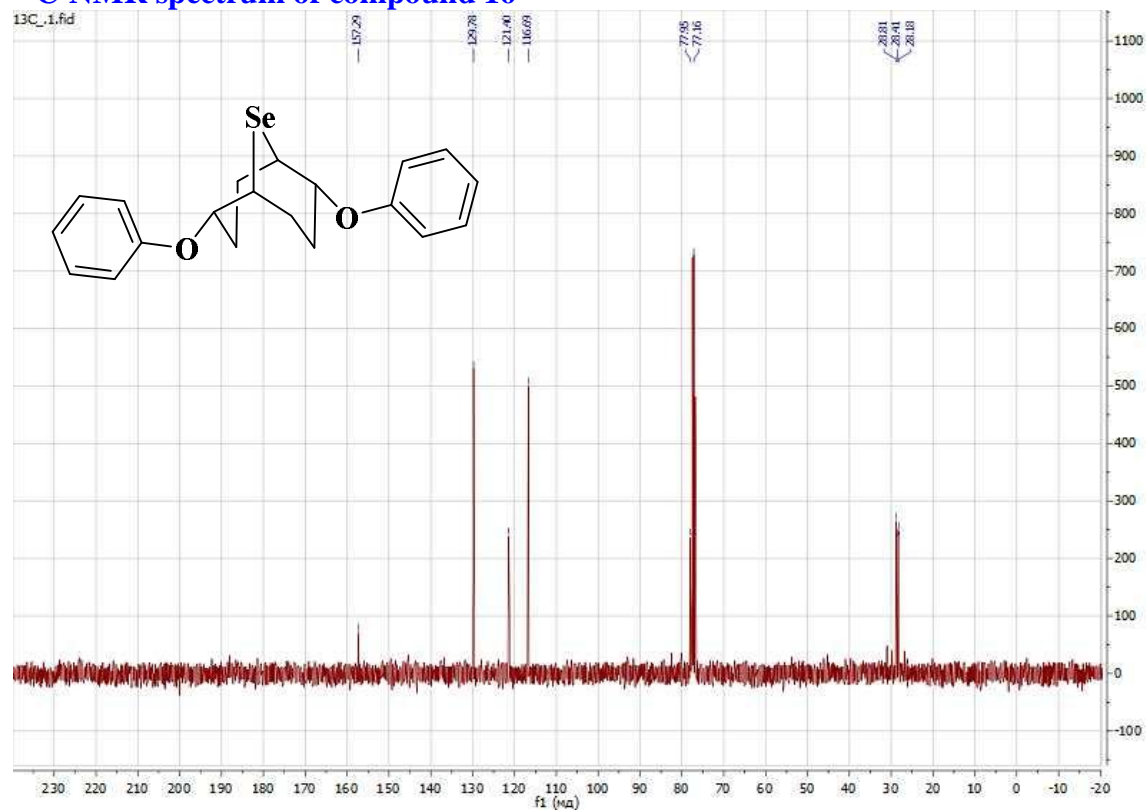

**$^{13}\text{C}$ -NMR spectrum of compound 18**

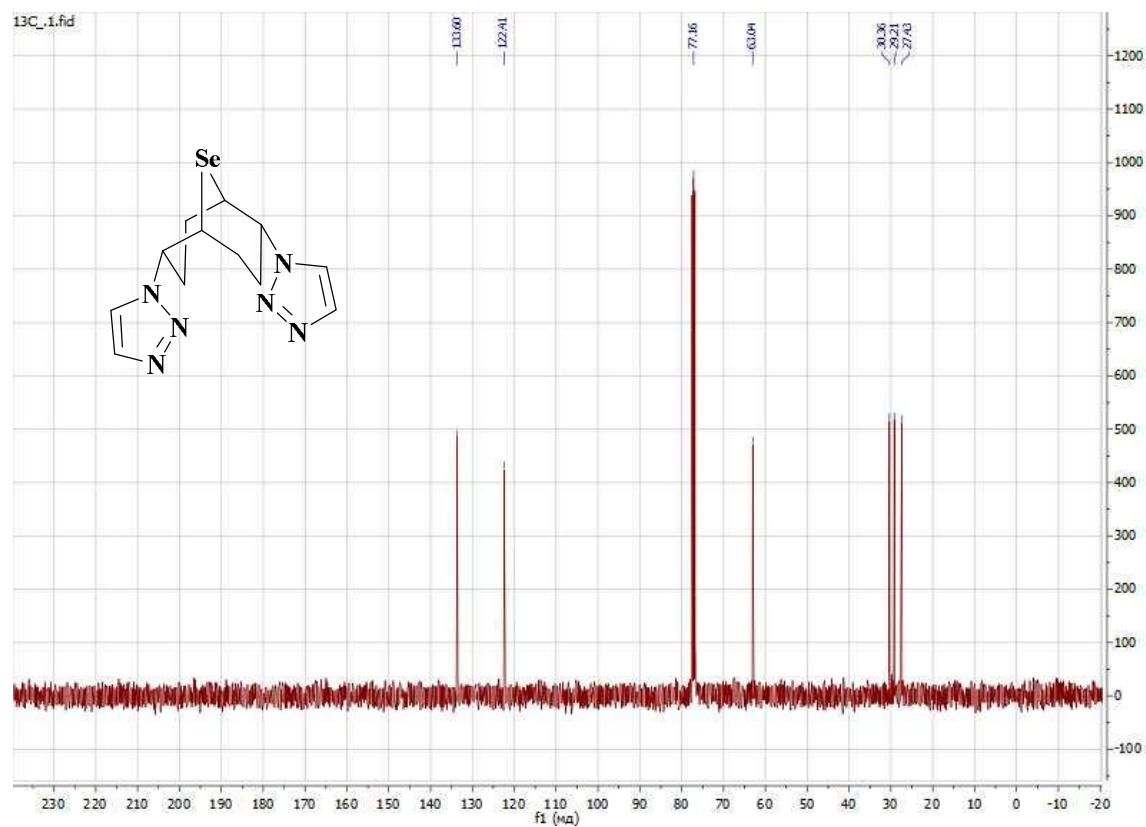

**$^{13}\text{C}$ -NMR spectrum of compound 19 (DMSO- $d_6$ /CDCl $_3$ )**

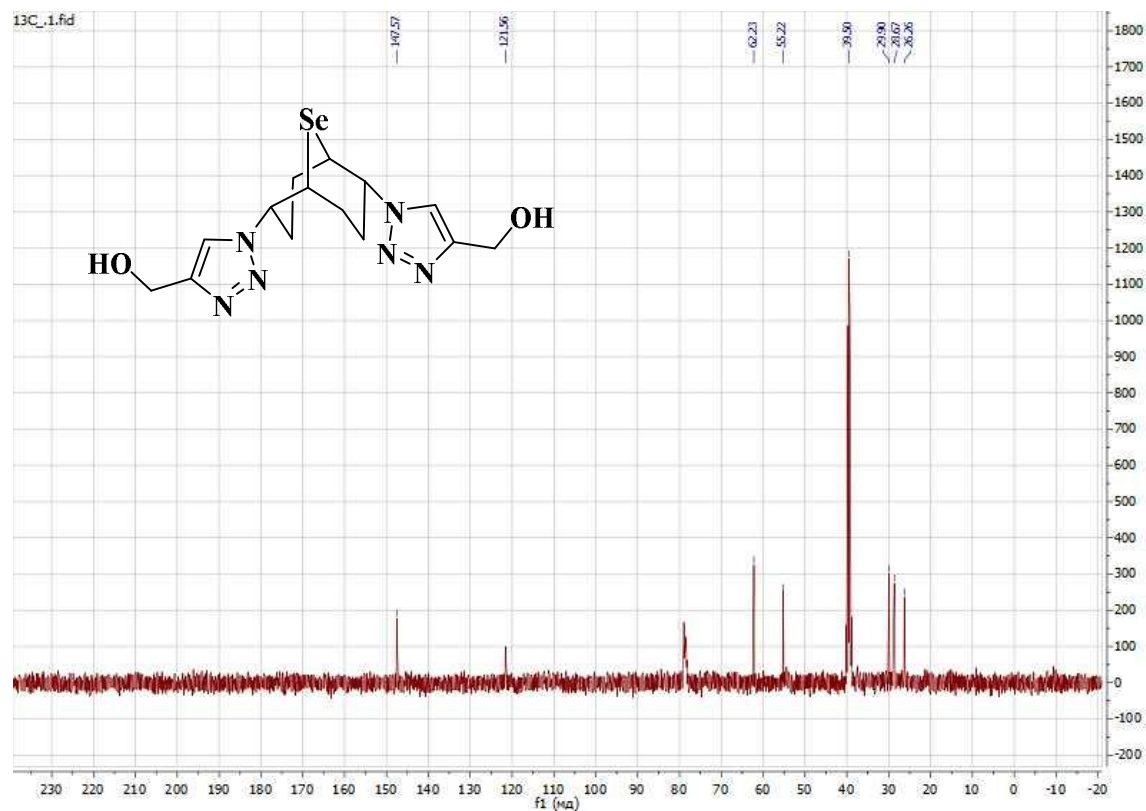

**$^{13}\text{C}$ -NMR spectrum of compound 22**

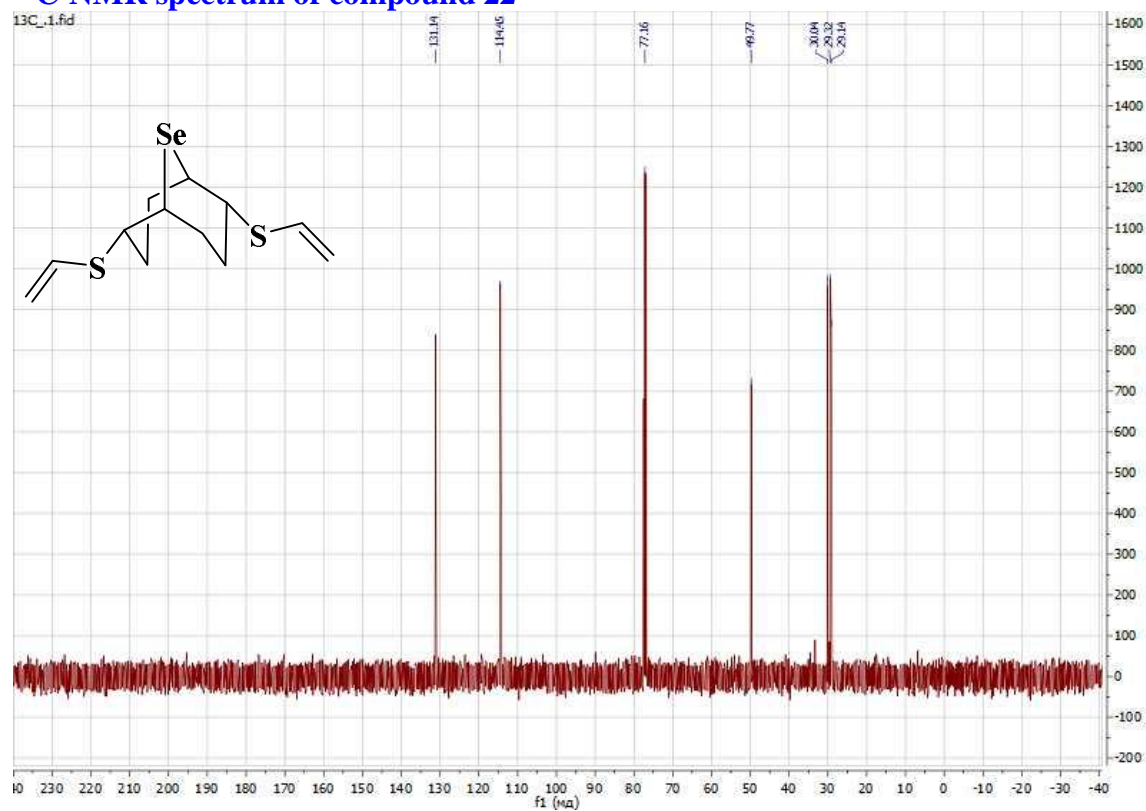

### $^{13}\text{C}$ -NMR spectrum of compound 23

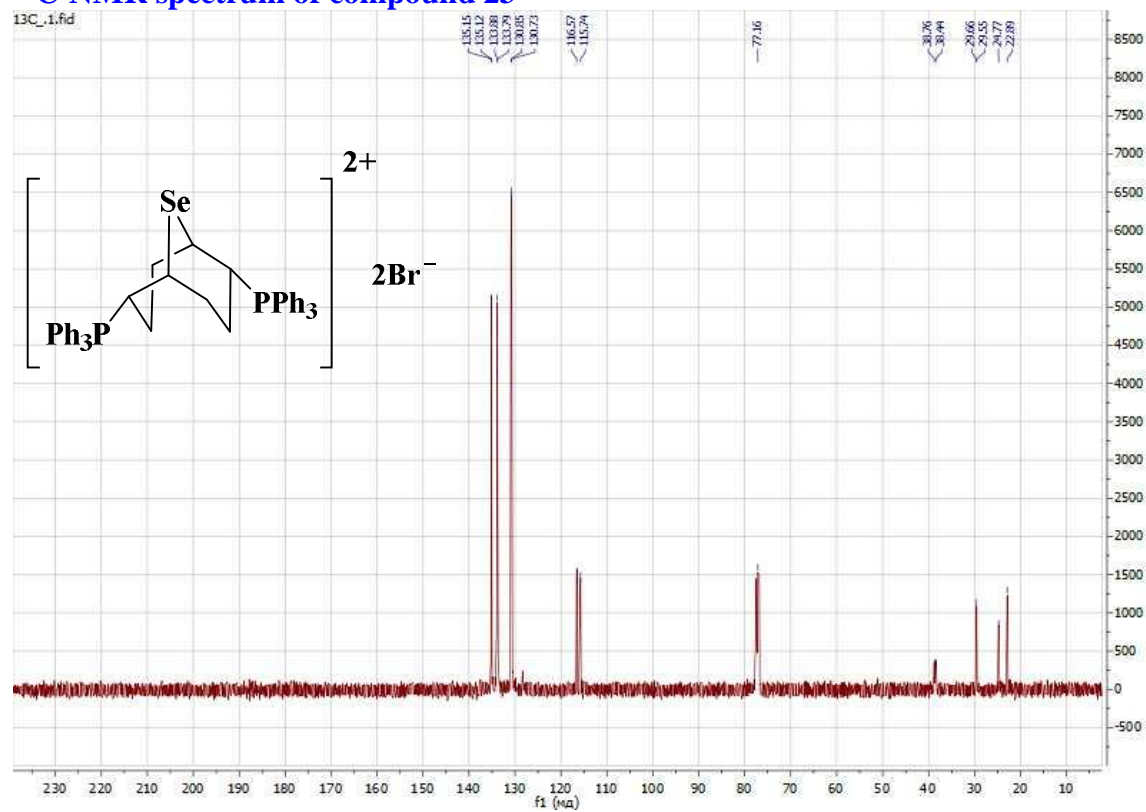

### $^{13}\text{C}$ -NMR spectrum of compound 24

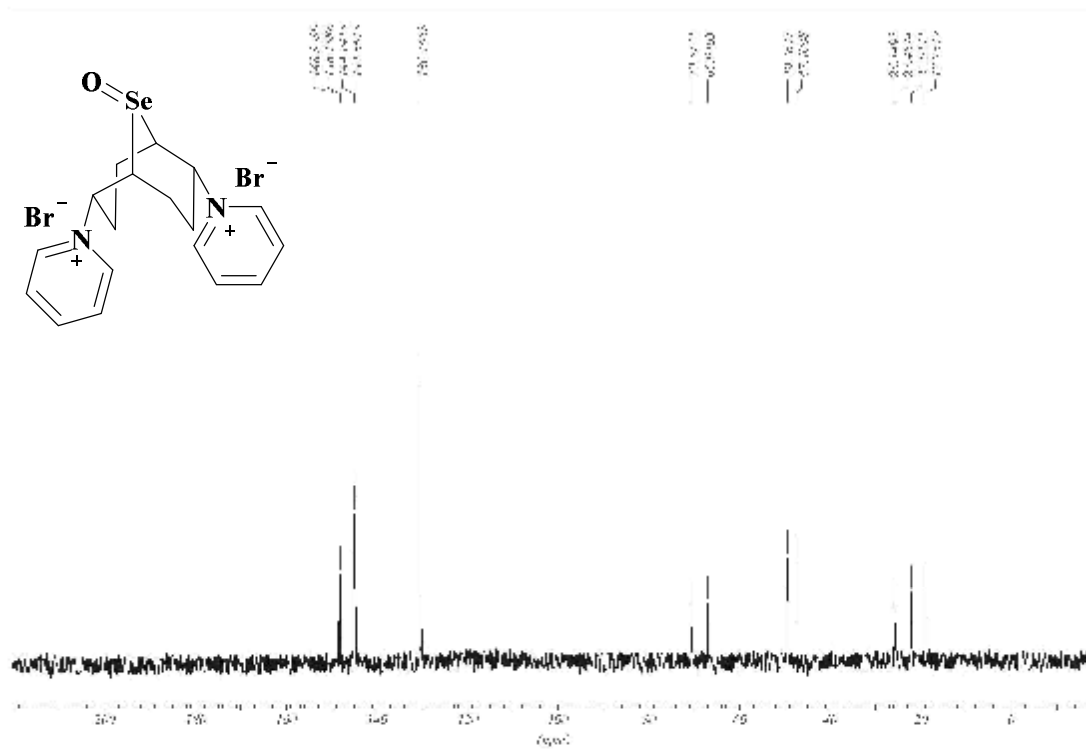



## $^{13}\text{C}$ -NMR spectrum of compound 25

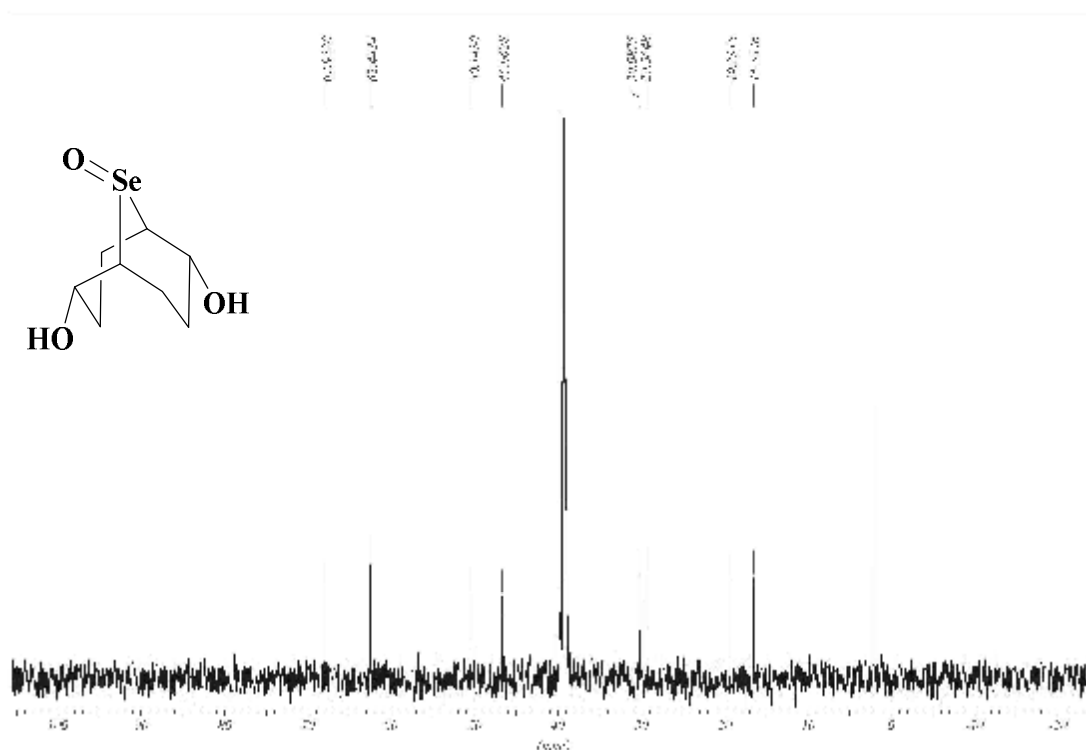

## Examples of $^{77}\text{Se}$ -NMR and $^1\text{H}$ - $^{77}\text{Se}$ -HMBC NMR Spectra

### $^{77}\text{Se}$ -NMR spectrum of compound 4

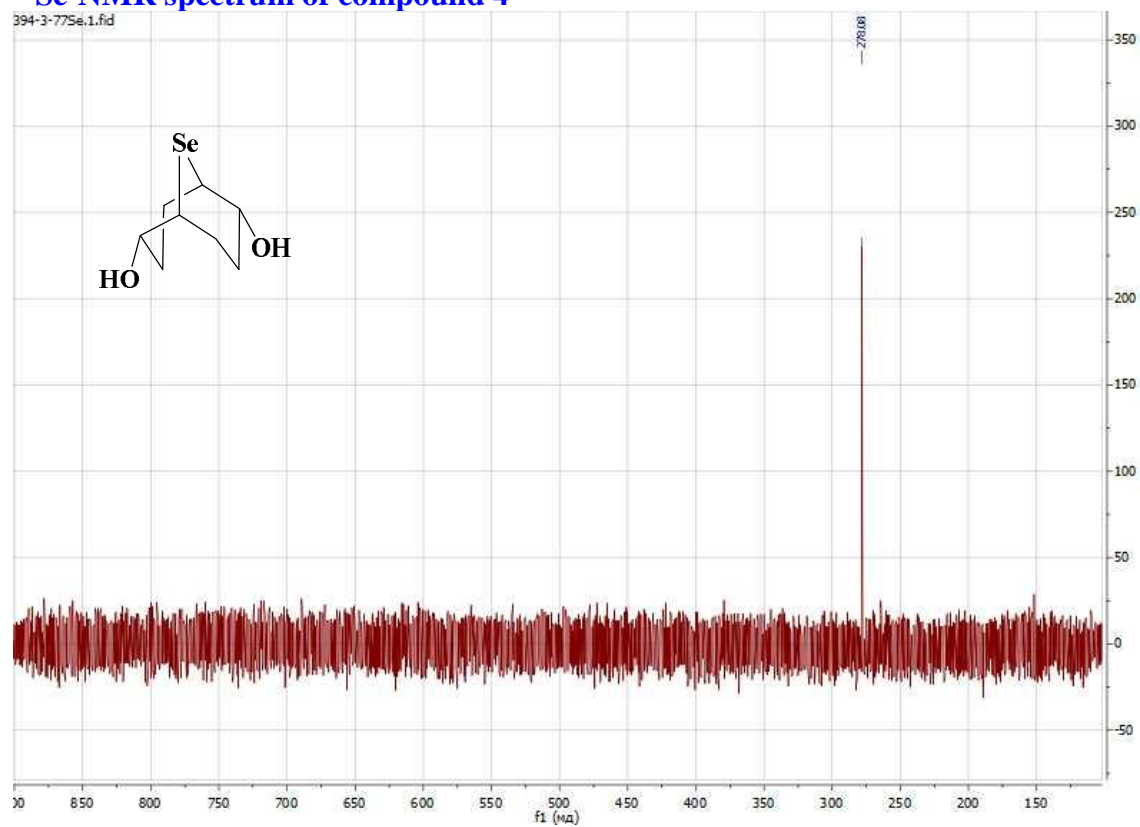



<sup>1</sup>H-<sup>77</sup>Se-HMBC NMR spectrum of compound 6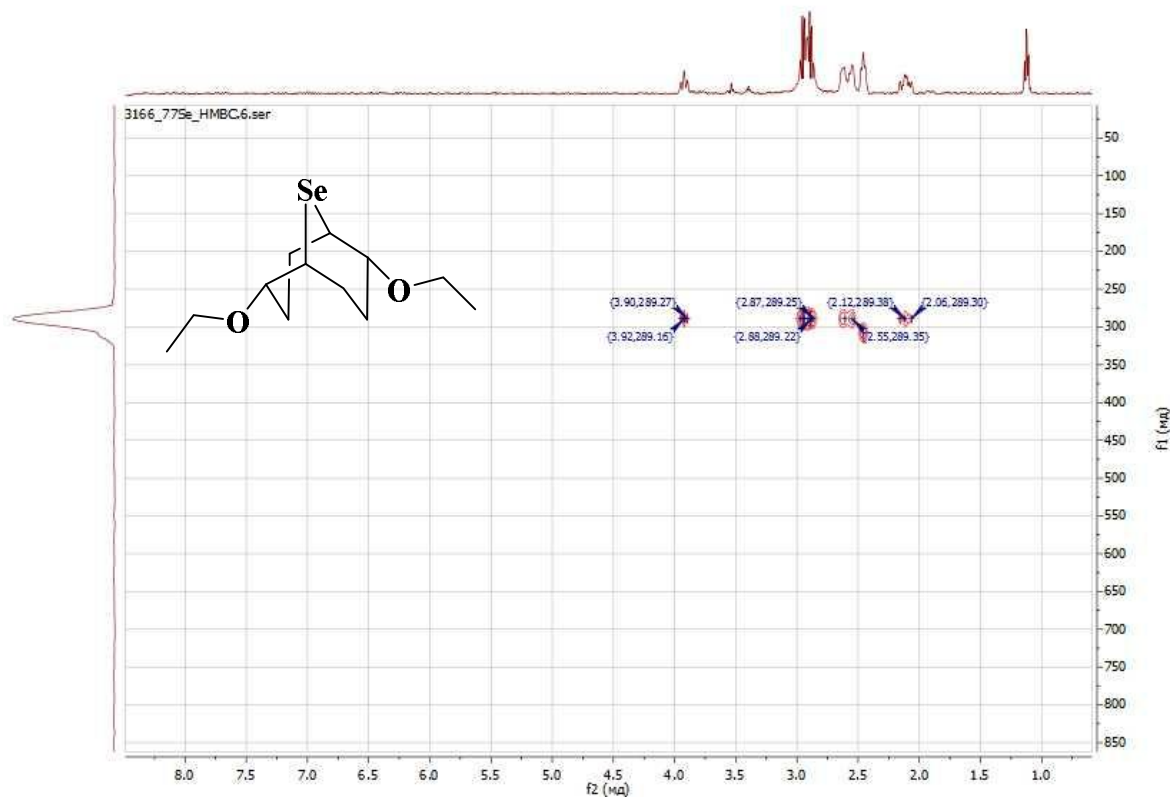 $^1\text{H}$ - $^{77}\text{Se}$ -HMBC NMR spectrum of compound 7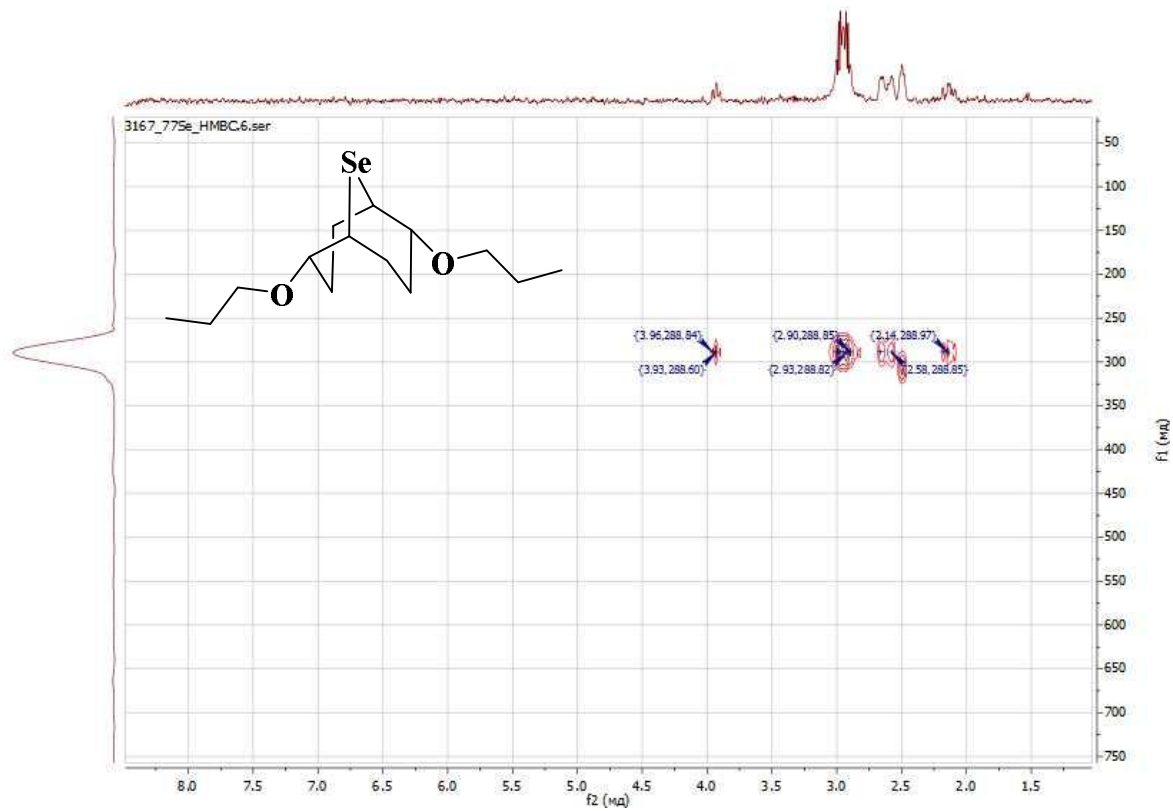

**$^1\text{H}$ - $^{77}\text{Se}$ -HMBC NMR spectrum of compound 10**

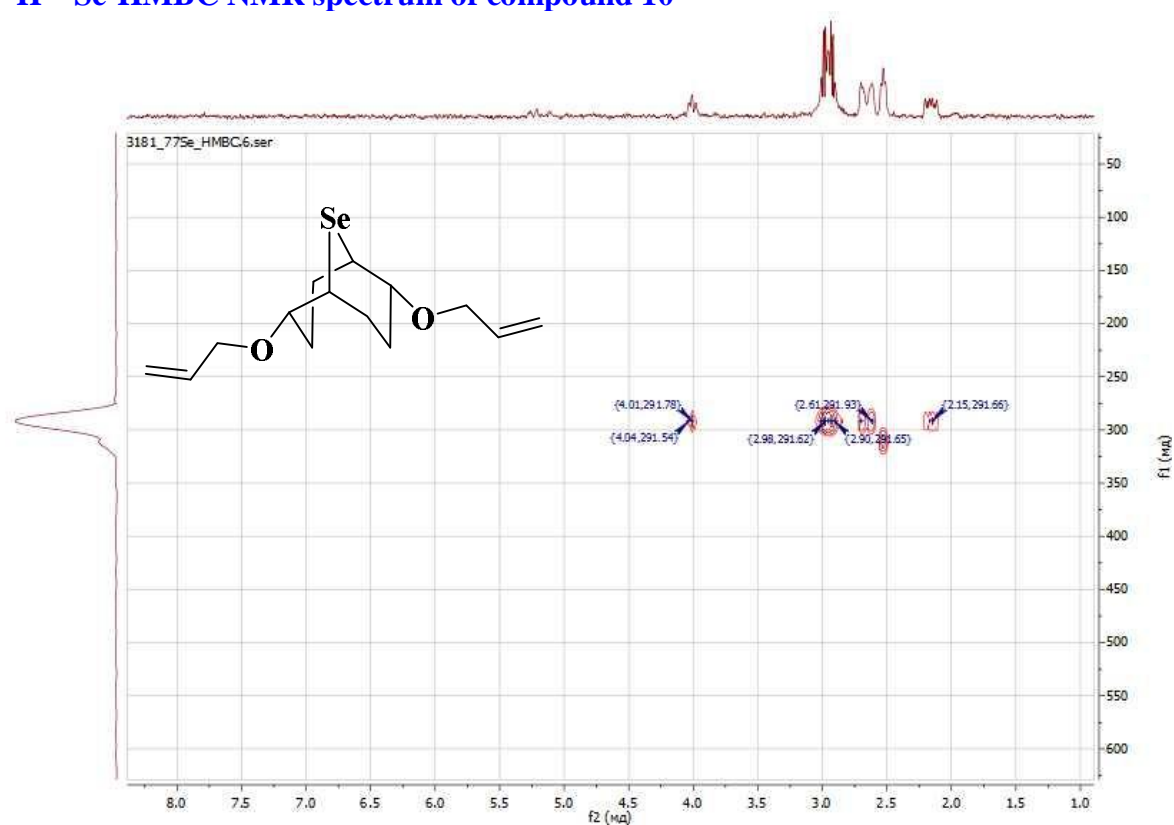

**$^1\text{H}$ - $^{77}\text{Se}$ -HMBC NMR spectrum of compound 11**

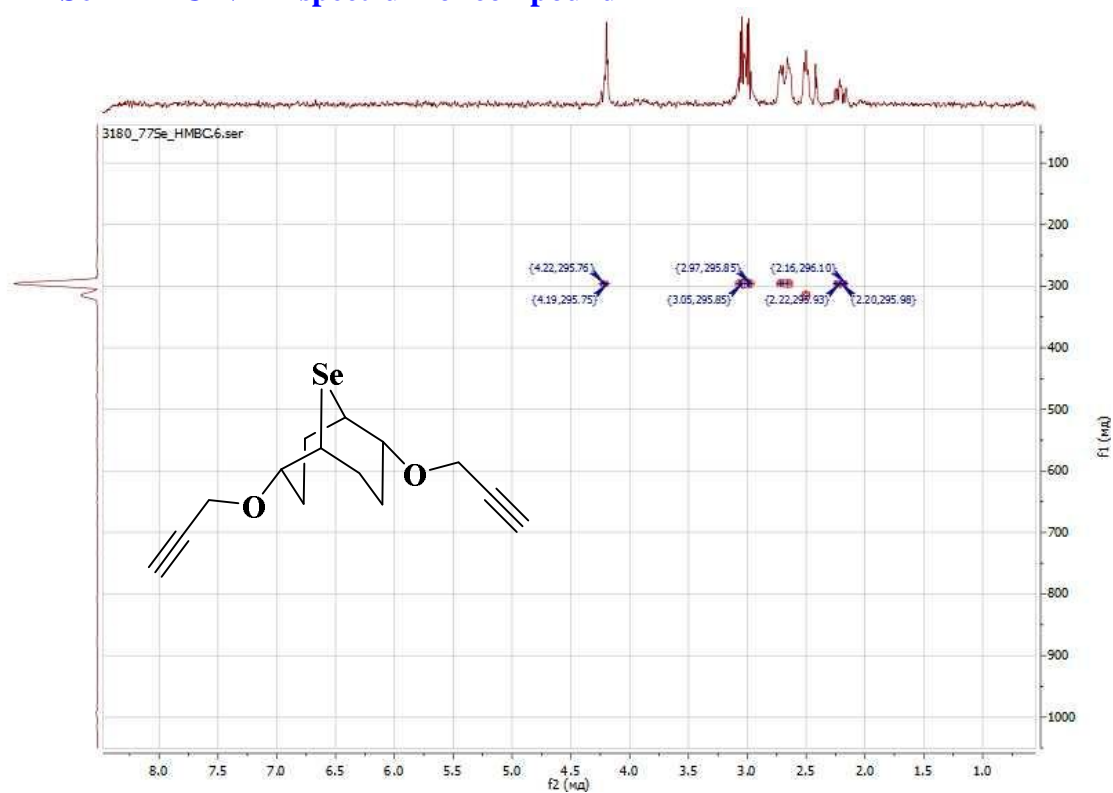

**$^1\text{H}$ - $^{77}\text{Se}$ -HMBC NMR spectrum of compound 19**

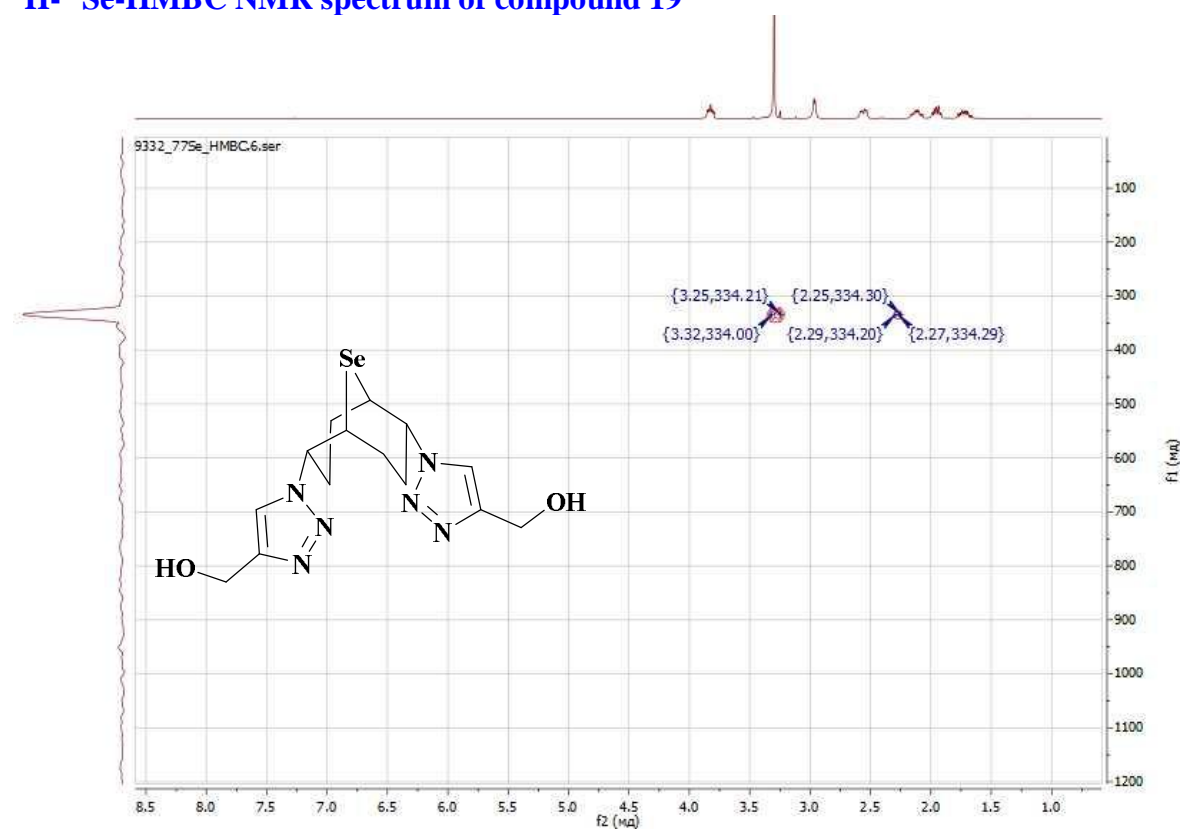

**$^{77}\text{Se}$ -HMR spectrum of compound 25**

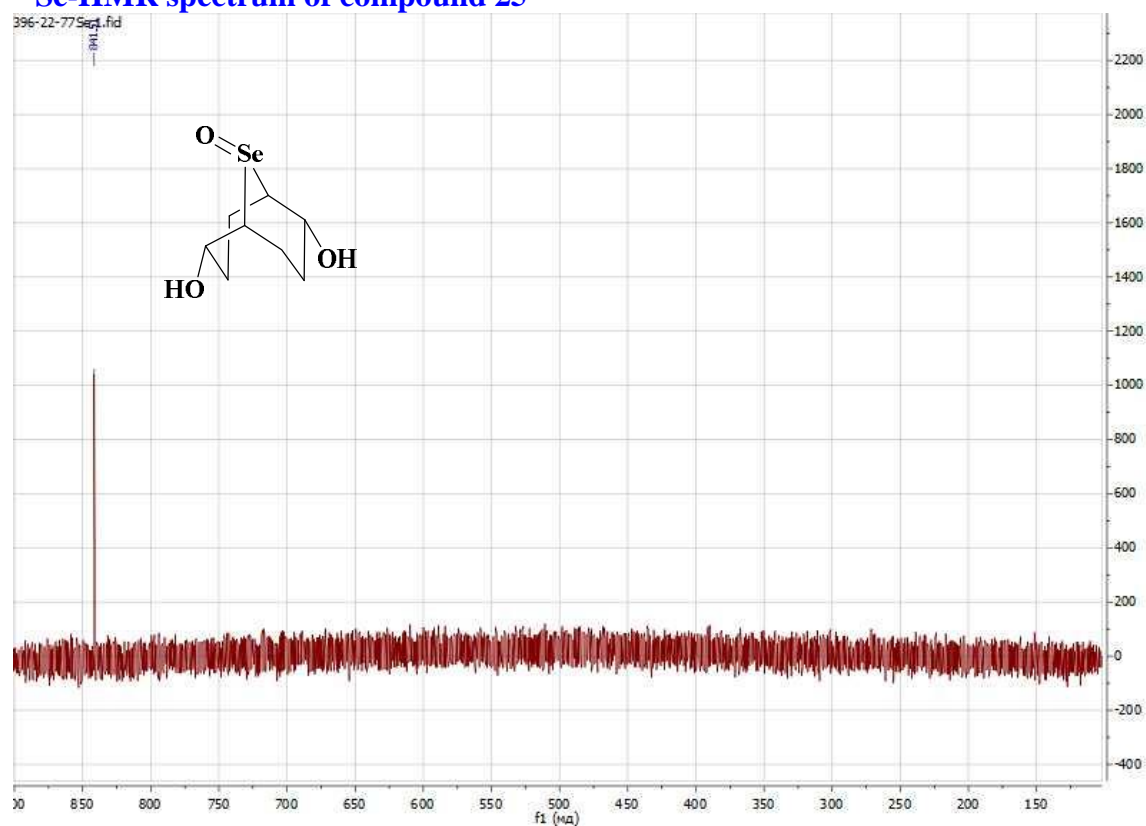

## Examples of Mass Spectra

Mass spectrum of bis(methoxy) derivative 5 ( $M^+ = 250$ )

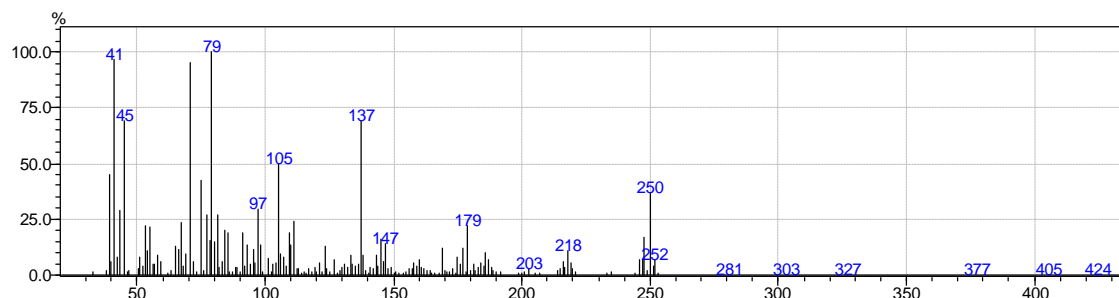

Mass spectrum of bis(ethoxy) derivative 6 ( $M^+ = 278$ )

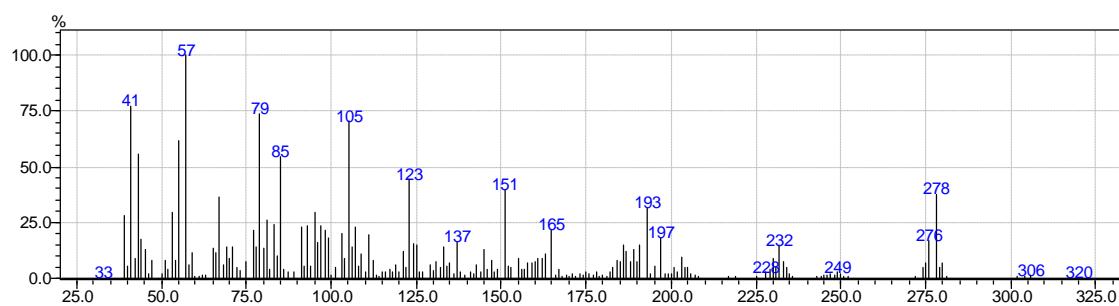

Mass spectrum of bis(propoxy) derivative 7 ( $M^+ = 306$ )

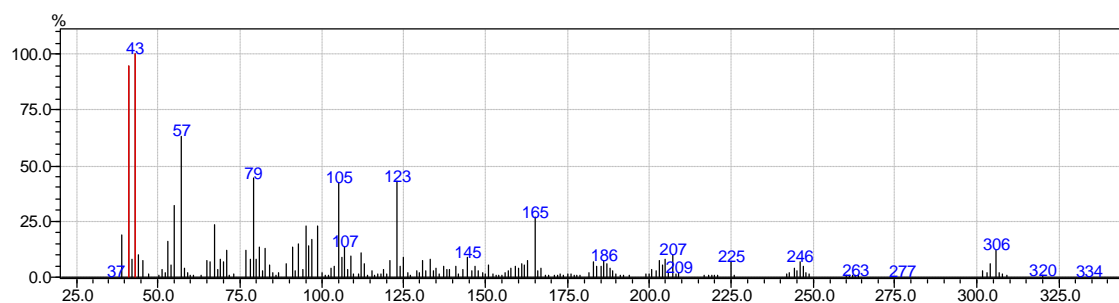

**Mass spectrum of bis(butoxy) derivative 8 ( $M^+ = 334$ )**

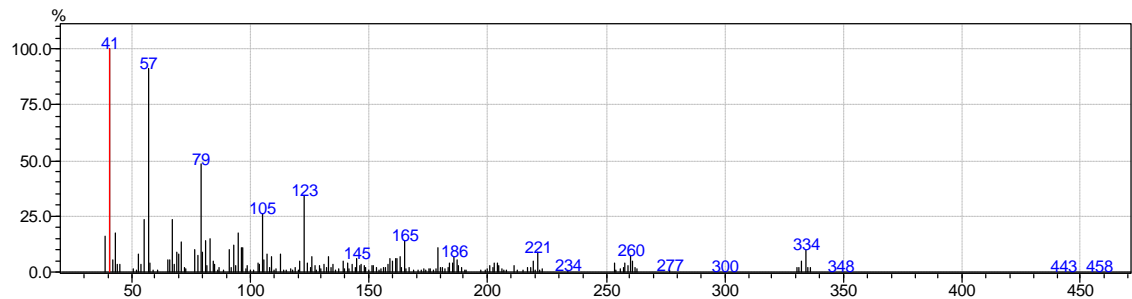

**Mass spectrum of bis(isobutoxy) derivative 9 ( $M^+ = 334$ )**

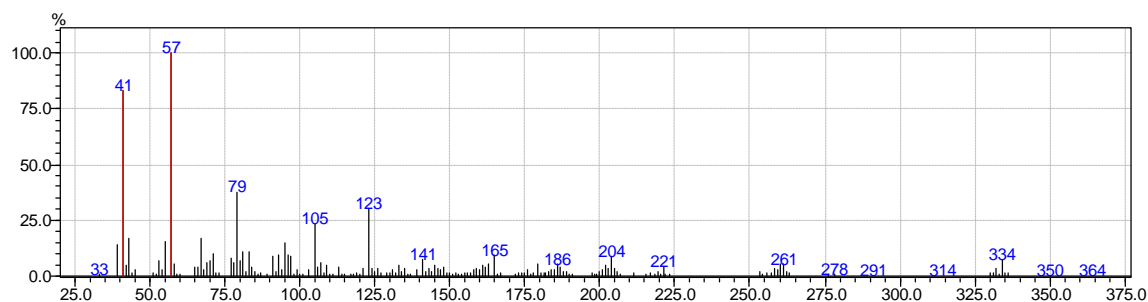

**Mass spectrum of bis(allyloxy) derivative 10 ( $M^+ = 302$ )**

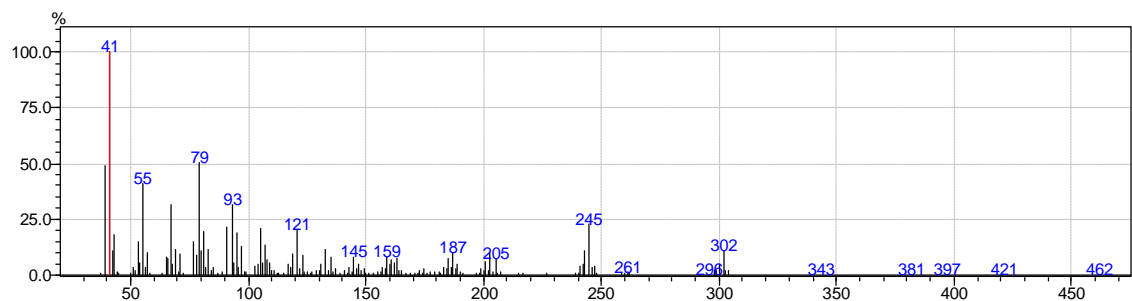

**Mass spectrum of bis(propargyloxy) derivative 11 ( $M^+ = 298$ )**

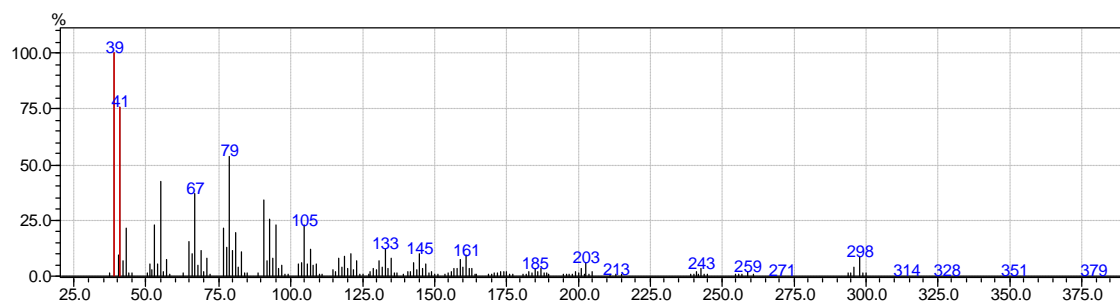

**Mass spectrum of bis(4-methoxyphenoxy) derivative 14 ( $311 = [M^+ - \text{MeOC}_6\text{H}_4\text{O}]$ )**

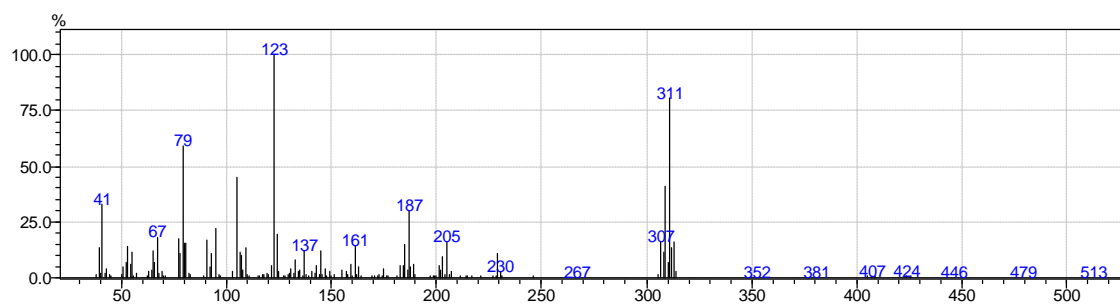

**Mass spectrum of bis(3,5-dimethylphenoxy) derivative 15 ( $309 = [M^+ - \text{Me}_2\text{C}_6\text{H}_3\text{O}]$ )**

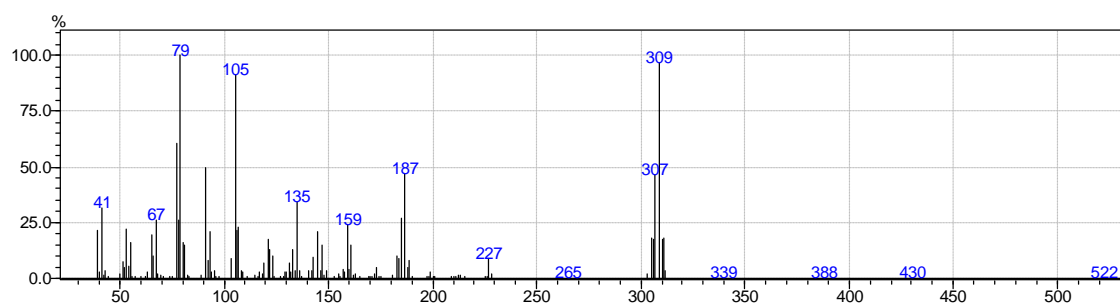

**Mass spectrum of bis(phenyloxy) derivative 16 ( $281 = [M^+ - C_6H_5O]$ )**

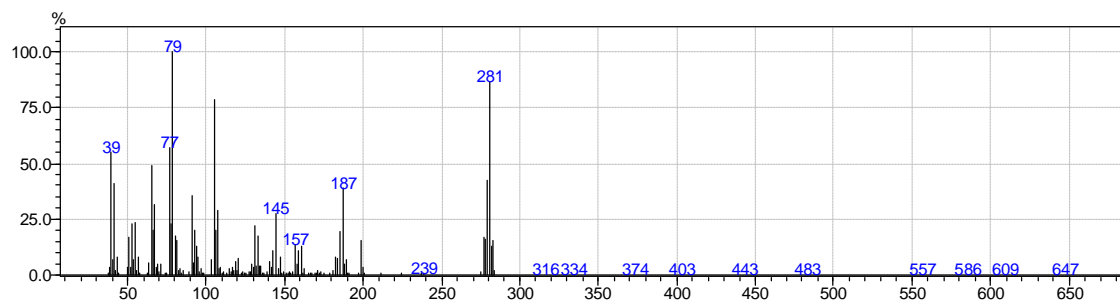

Supplement: s1 [file s1]
